# Supplementary material for: Mutations in six nephrosis genes delineate a pathogenic pathway amenable to treatment
Source: PubMed Central journal article supplement (PMC5958119; doi:10.1038/s41467-018-04193-w), 2018-05-17
Supplement: 41467_2018_4193_MOESM1_ESM.pdf [file 41467_2018_4193_MOESM1_ESM.pdf]

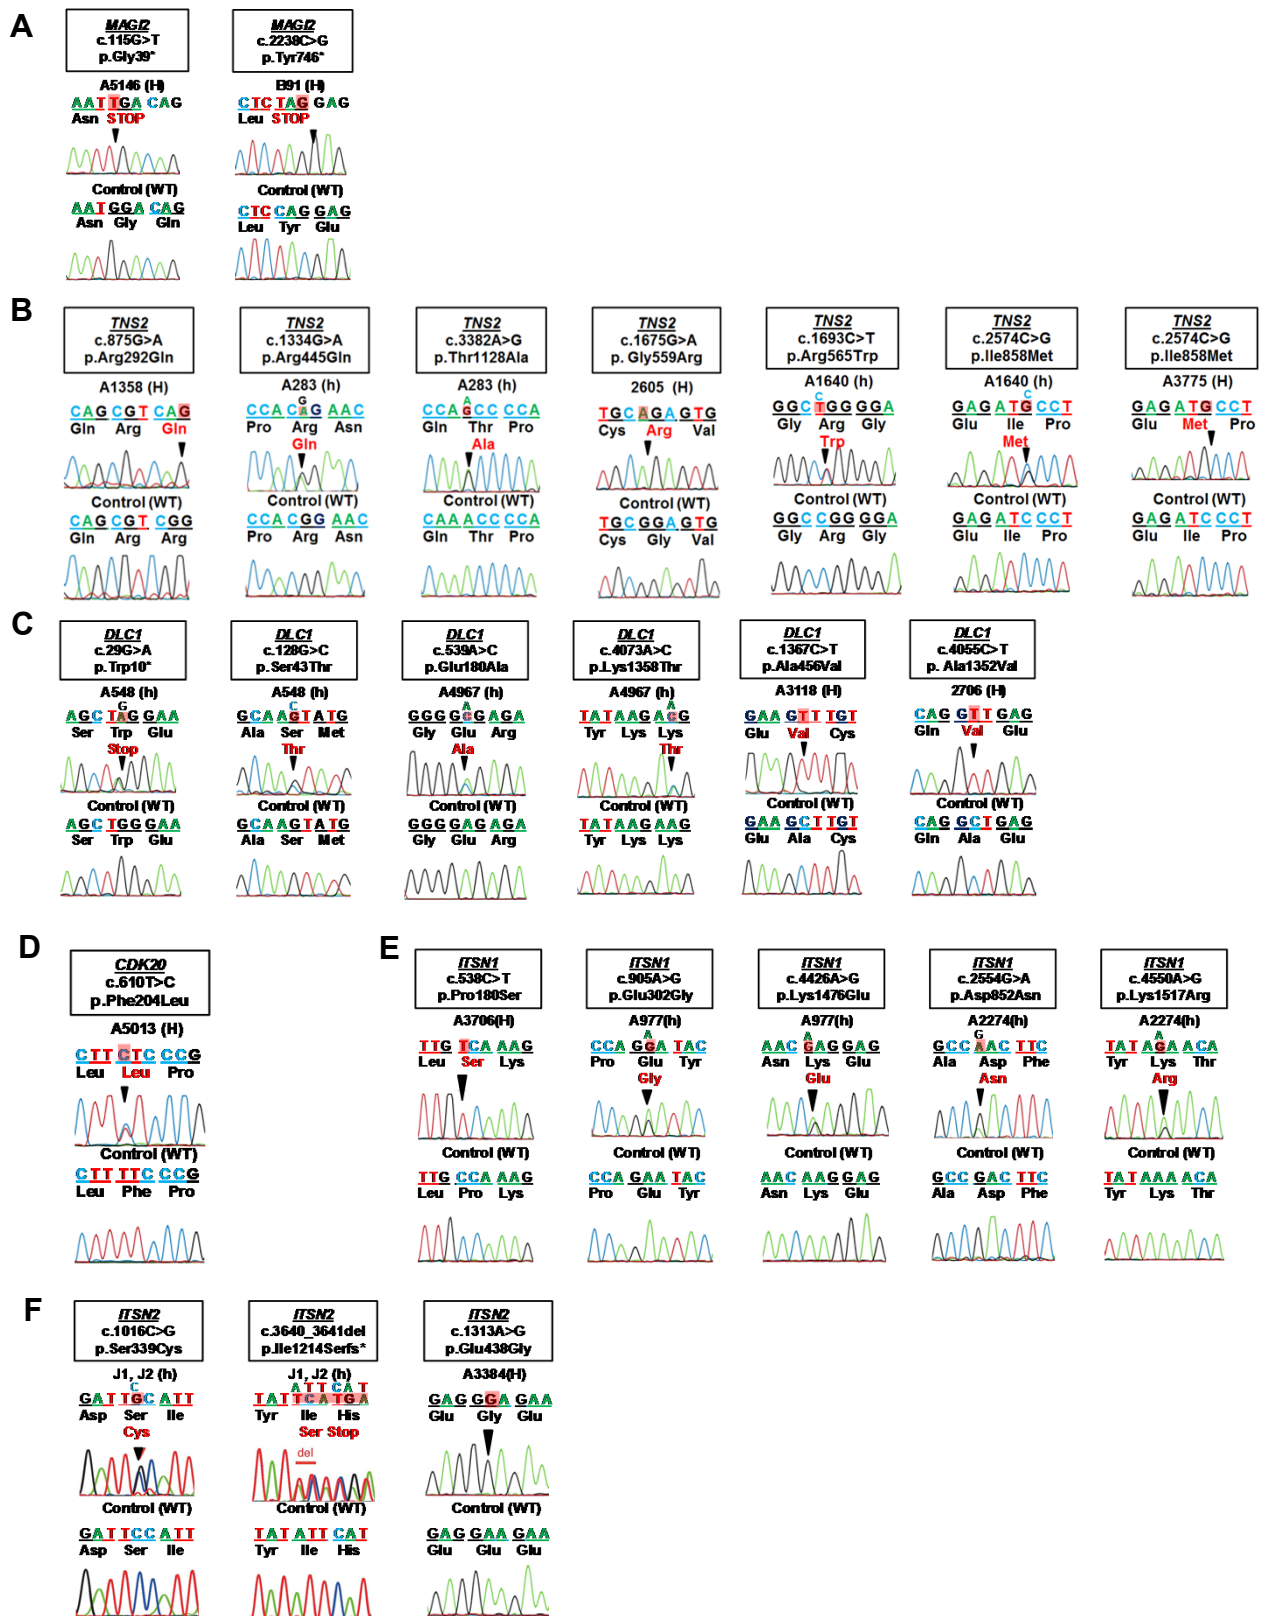

**Supplementary Figure 1. Sequencing traces of individuals with mutations in *MAG2* (A), *TNS2* (B), *DLC1* (C), *CDK20* (D), *ITSN1* (E) and *ITSN2* (F) .**

Arrowheads denote altered nucleotides. H, homozygous mutation; h, heterozygous mutation; WT, wildtype.

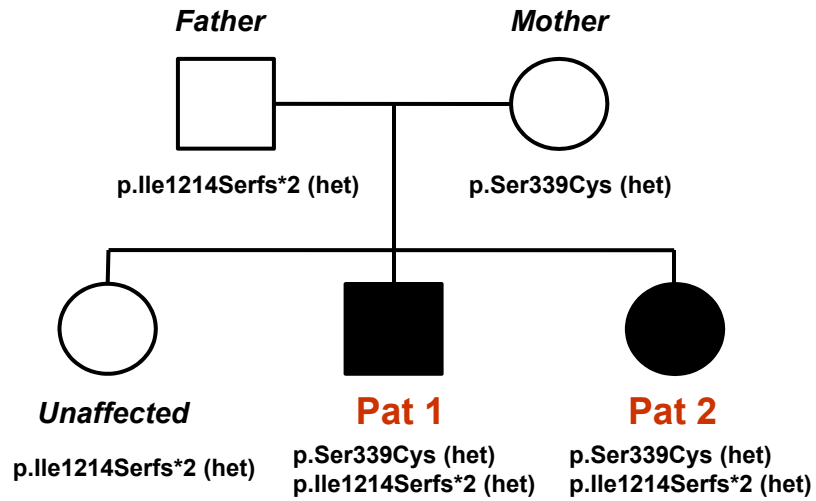

**Supplementary Figure 2. Pedigree of Japanese family (Pat 1 and Pat 2) with pTSNS identified with mutations in *ITSN2*.**

Parents and the older sister are healthy and showed normal urinary findings.

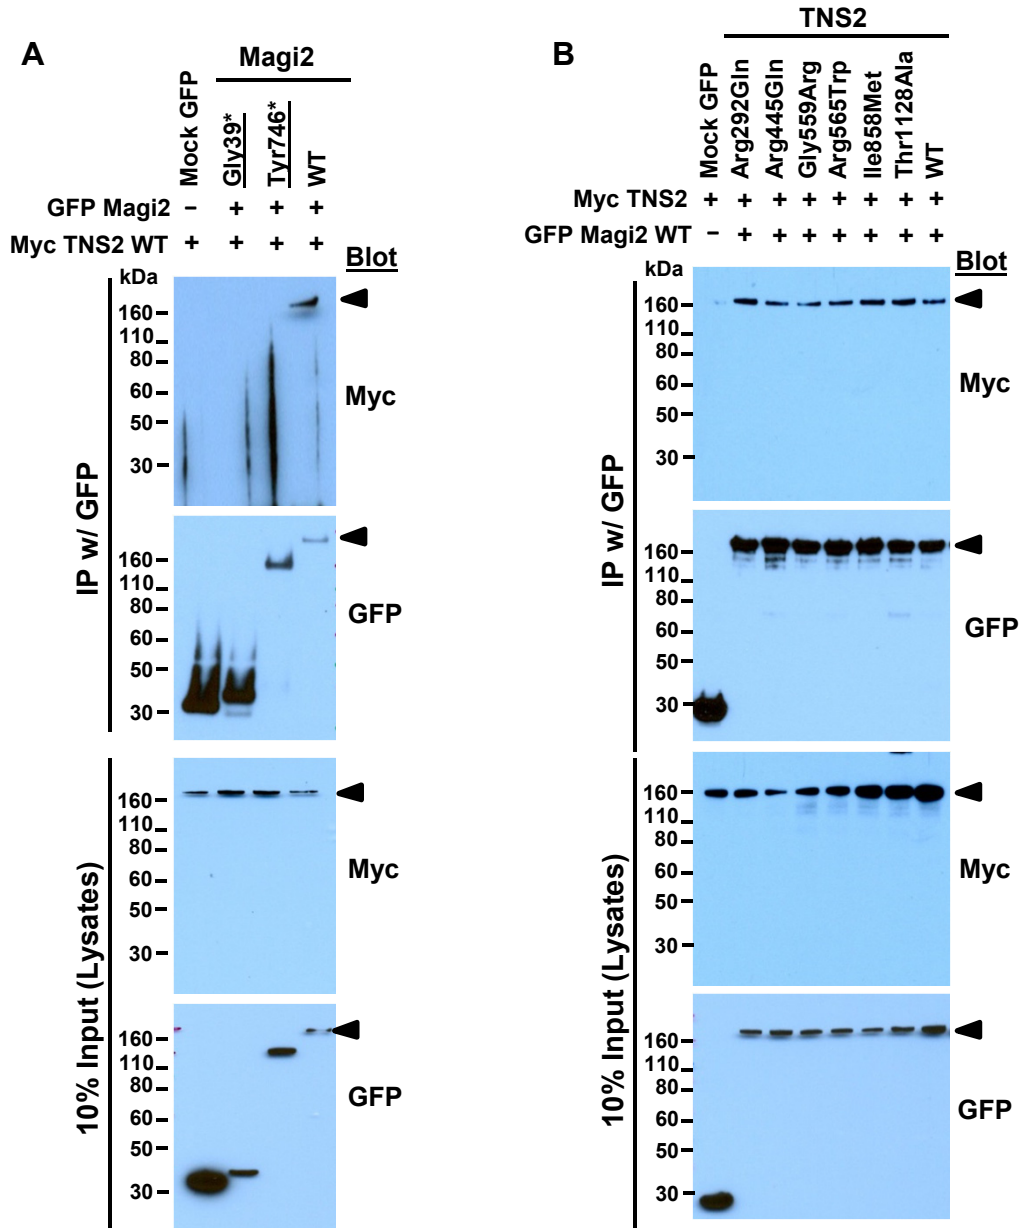

**Supplementary Figure 3. TNS2 interacts with Magi2 upon co-overexpression in HEK293T cells.**

**(A)** Both mutant rat *Magi2* clones, Gly39\* and Tyr746\* (underlined), reflecting alleles identified in individuals with NS abrogate this interaction. This is the confirmatory experiment to **Fig. 2b**.

**(B)** Mutant clones reflecting alleles of human *TNS2* identified in individuals with NS do not abrogate the interaction with rat *Magi2*. WT, wild type.

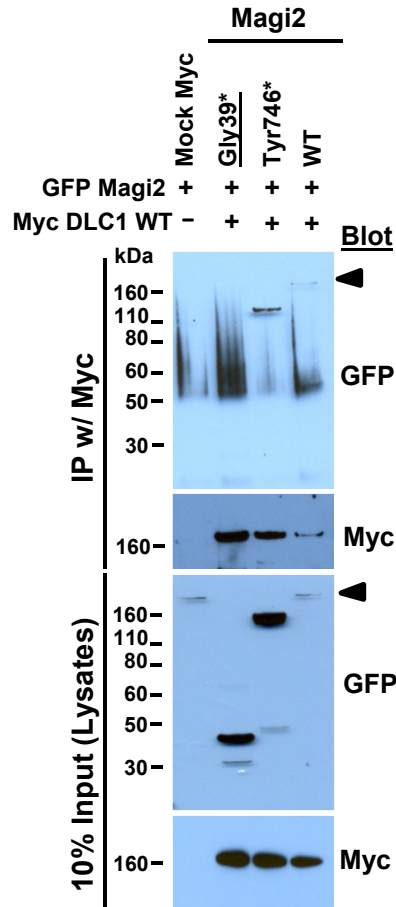

**Supplementary Figure 4. DLC1 interacts with Magi2 upon co-overexpression in HEK293T cells.**

One mutant clone Gly39\* (underlined), reflecting an allele of *MAGI2* identified in individual with NS abrogates this interaction. This is the confirmatory experiment to **Fig. 2c**.

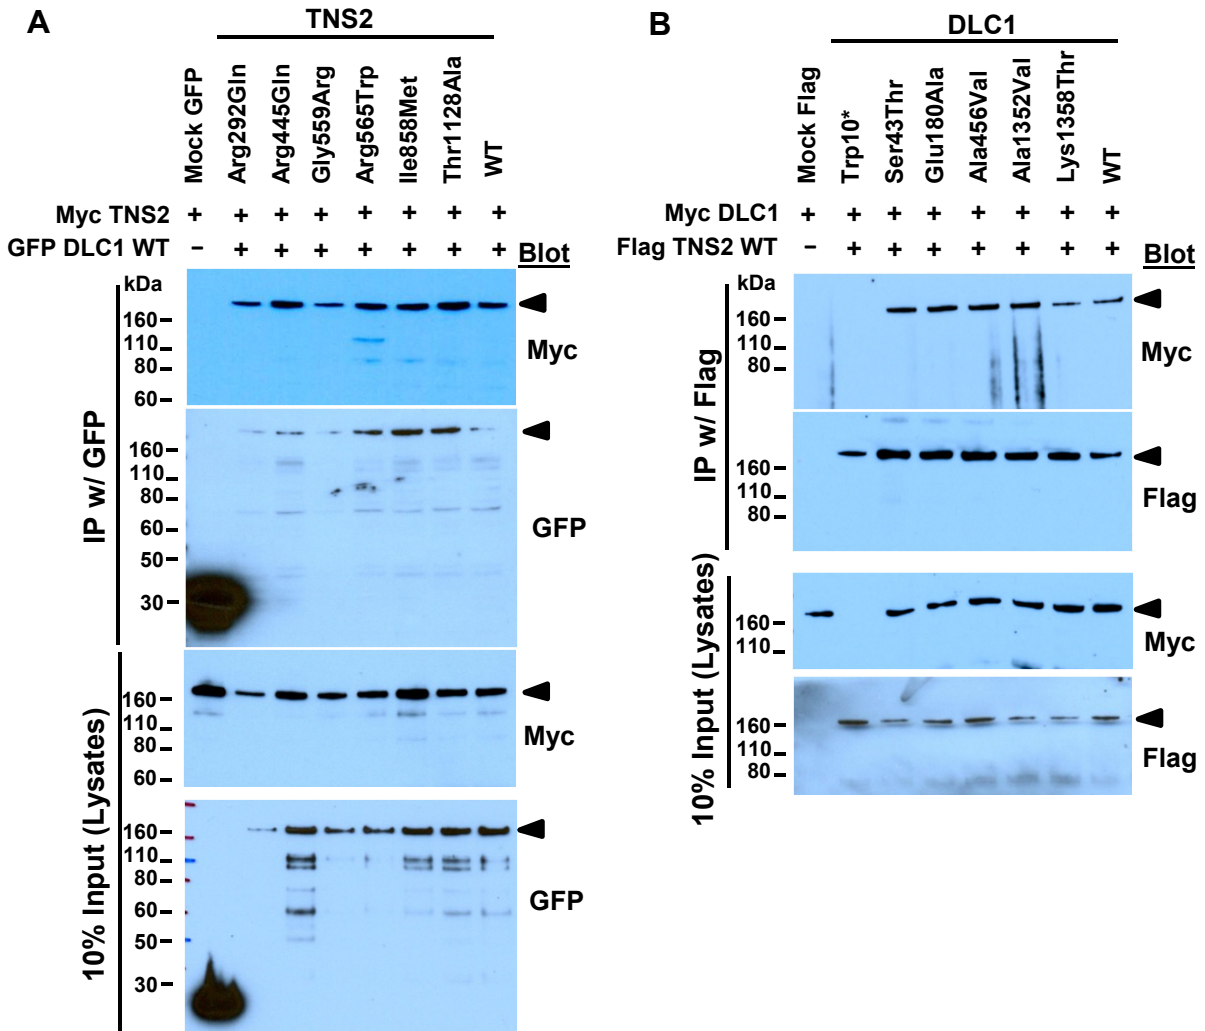

**Supplementary Figure 5. DLC1 interacts with TNS2 upon co-overexpression in HEK293T cells.**

(A) Myc tagged TNS2 interacts with GFP tagged DLC1 upon co-overexpression in HEK293T cells. None of the mutant clones reflecting alleles of *TNS2* identified in individuals with NS abrogate this interaction.

(B) Myc tagged DLC1 interacts with Flag tagged TNS2 upon co-overexpression in HEK293T cells. None of the clones reflecting alleles of *DLC1* identified in individuals with NS, except Arg10\*, abrogate interaction with TNS2. WT, wild type.

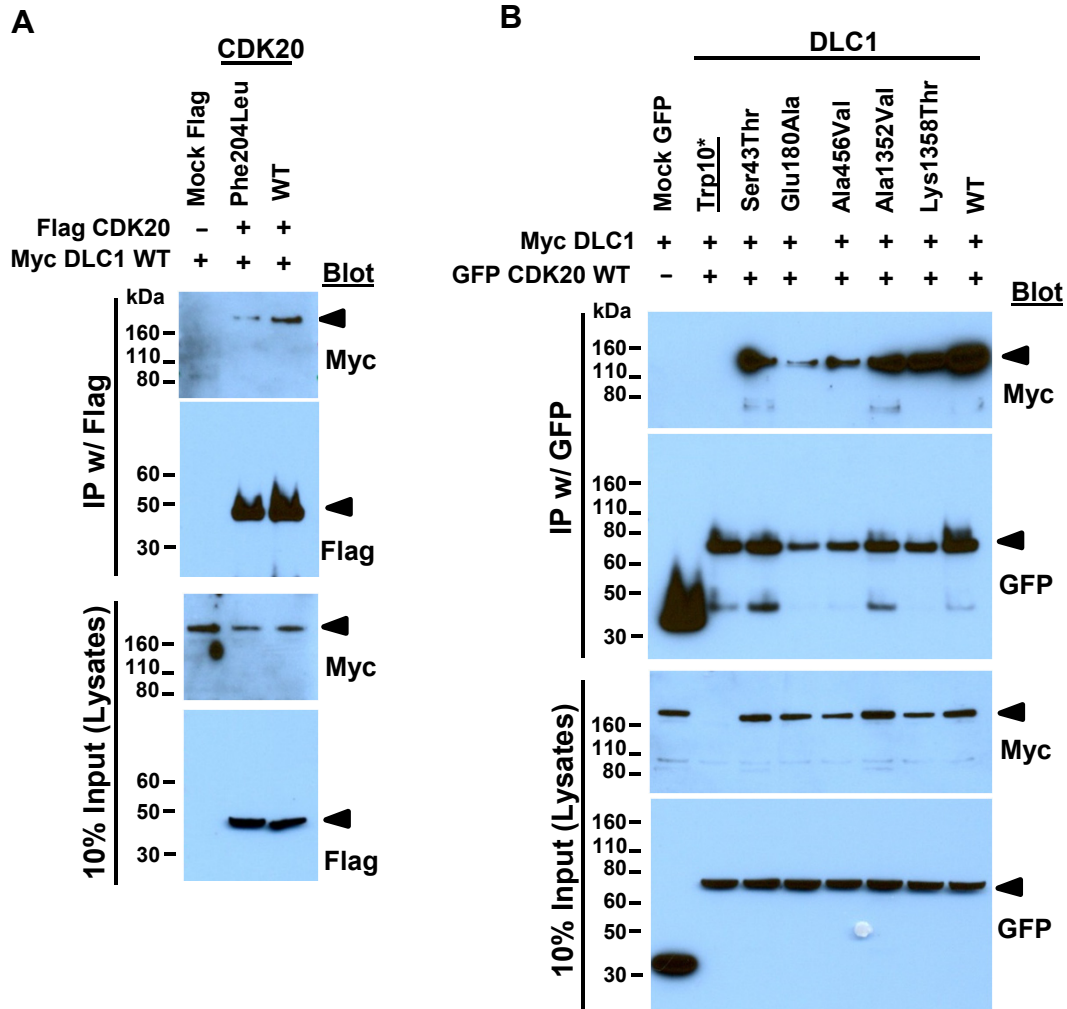

**Supplementary Figure 6. CDK20 interacts with DLC1 upon co-overexpression in HEK293T cells.**

**(A)** The mutant clone reflecting the mutation of *CDK20* identified in individual with NS does not abrogate the interaction with DLC1. This is the confirmatory experiment of Fig. 2d.

**(B)** None of the mutant clones reflecting alleles of *DLC1* identified in individuals with NS, except Arg10\*, abrogate the interaction with CDK20. WT, wild type.

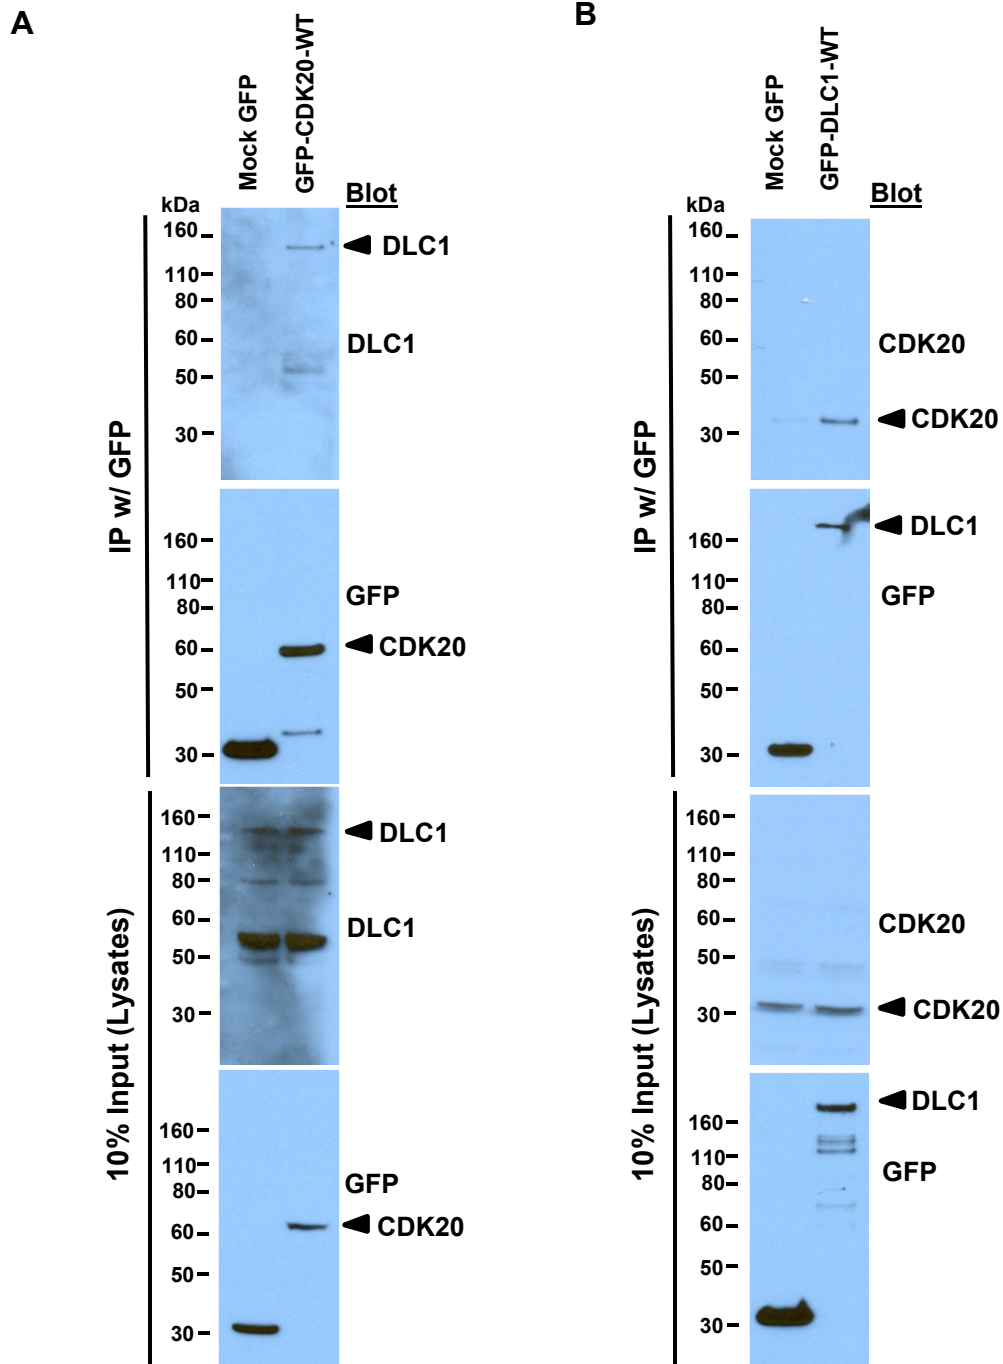

**Supplementary Figure 7. CDK20 interacts with DLC1 in HEK293T cells.**

**A. Endogenous DLC1 interacts with overexpressed GFP-tagged human CDK20 in HEK293T cells.**

**B. Endogenous CDK20 interacts with overexpressed GFP-tagged human DLC1 in HEK293T cells (this is confirmatory experiment of A).**

WT, wild type.

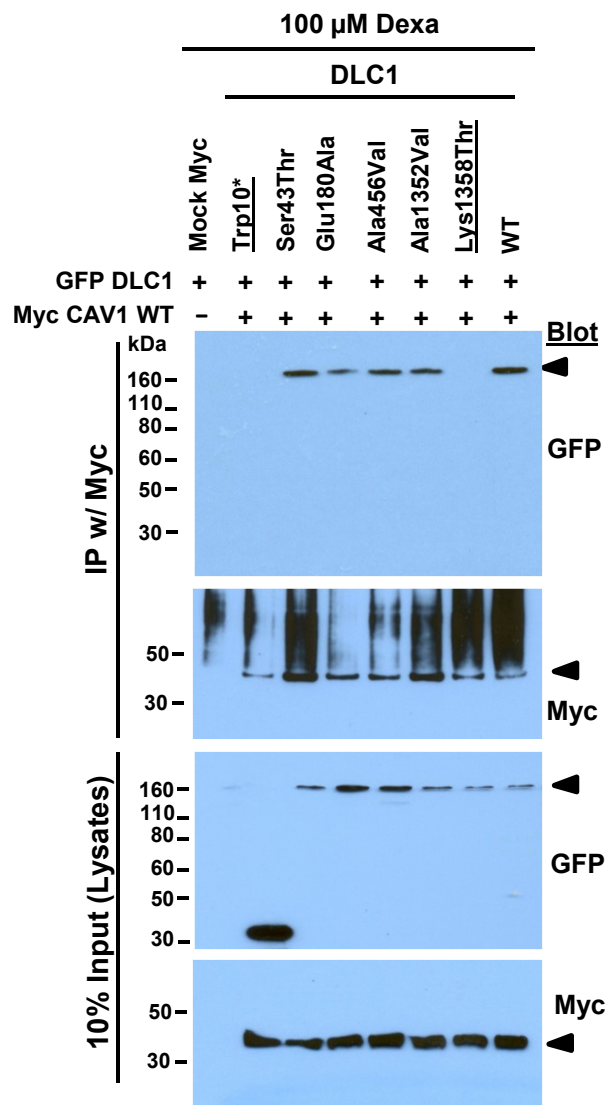

**Supplementary Figure 8. Treatment with dexamethasone does not interfere with abrogation of interaction between CAV1 and DLC1 mutants Trp10\* and Lys1358Thr.**

CAV1 and DLC1 were co-overexpressed in HEK293T cells, which were pre- and post-treated with 100  $\mu$ M of dexamethasone. However, this treatment did not interfere with abrogation of interaction of CAV1 and DLC1 by the mutants Trp10\* and Lys1358Thr, as demonstrated in **Fig 2e**. Two mutant DLC1 c-DNA clones, reflecting Trp10\* and Lys1358Thr alleles of NS patients A548-21 and A4967-21 respectively, still lacked this interaction. This is also a confirmatory experiment to **Fig. 2e**.

WT, wild type.



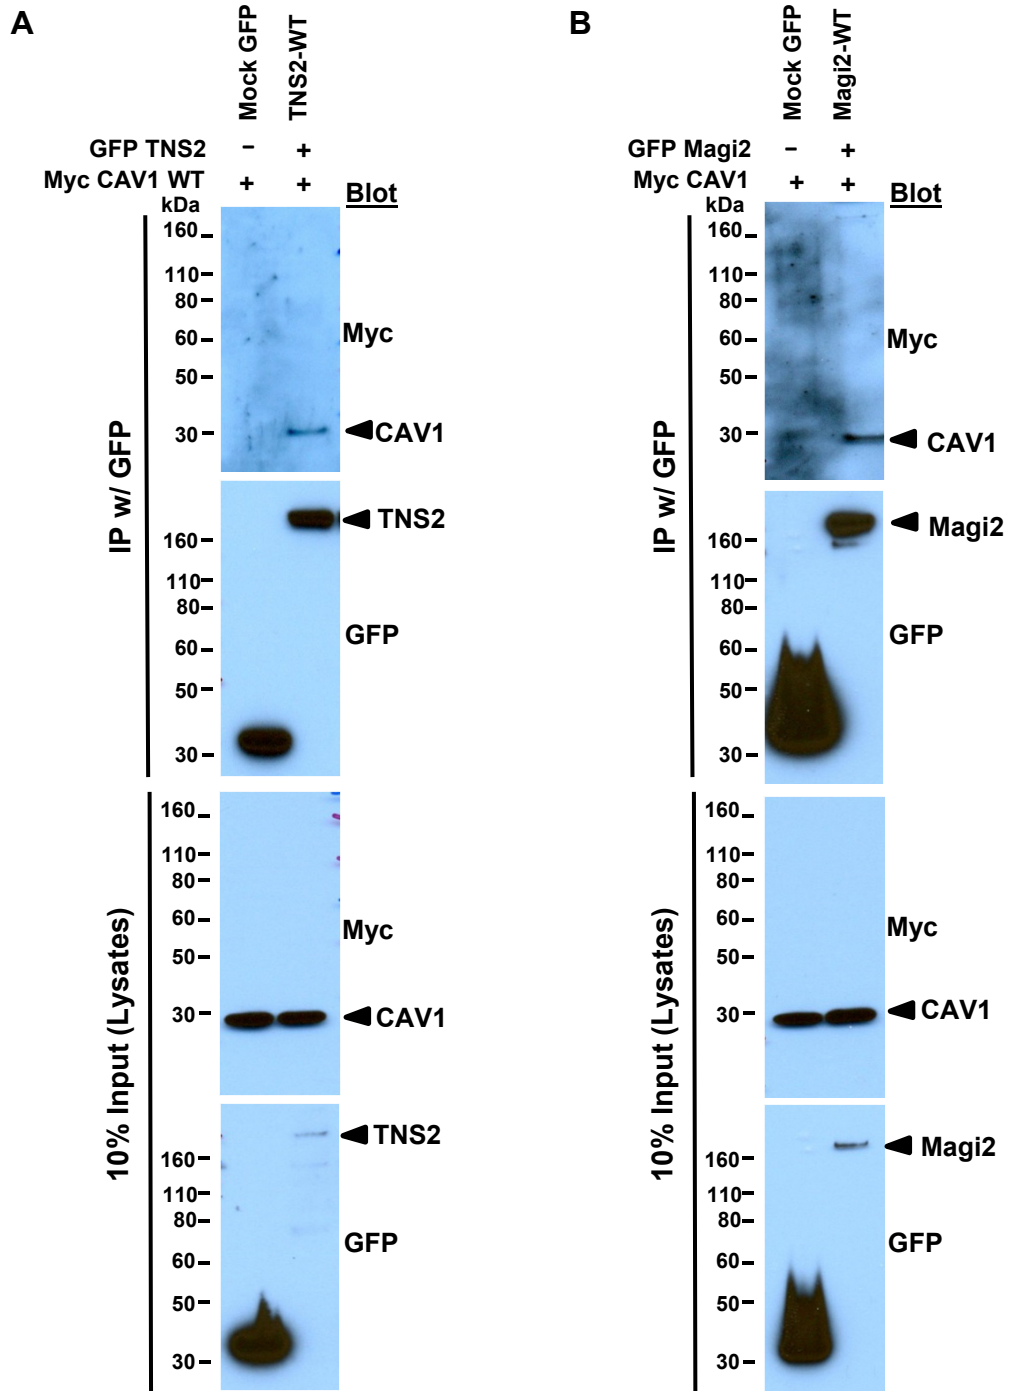

**Supplementary Figure 9. GFP tagged human TNS2 (A) and GFP tagged rat Magi2 (B) interact with Myc tagged CAV1 upon co-overexpression in HEK293T cells.**

WT, wild type.

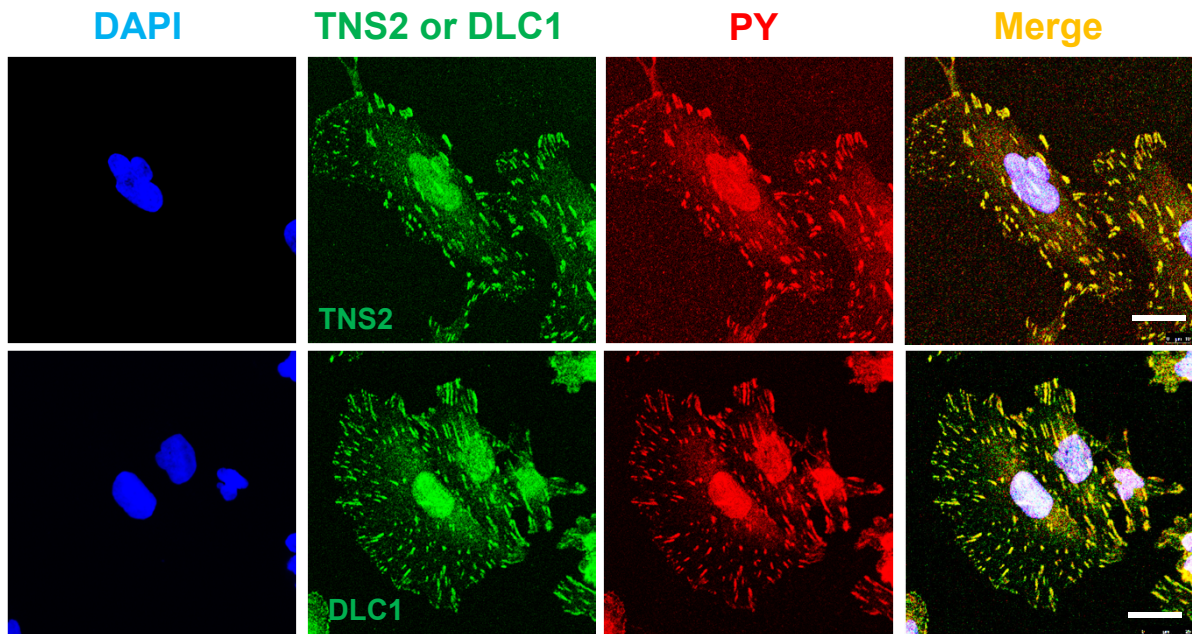

**Supplementary Figure 10. Endogenous expression of TNS2 and DLC1 in cultured human podocytes.**

Immortalized human podocytes were seeded on cover-glasses, and immunostained with TNS2 (green), DLC1 (green), phospho-tyrosine (PY, red) and DAPI after SDS permeabilization. TNS2, and DLC1 colocalize with phosphotyrosine at the focal adhesions in human podocytes (Scale bar 10 $\mu$ m).

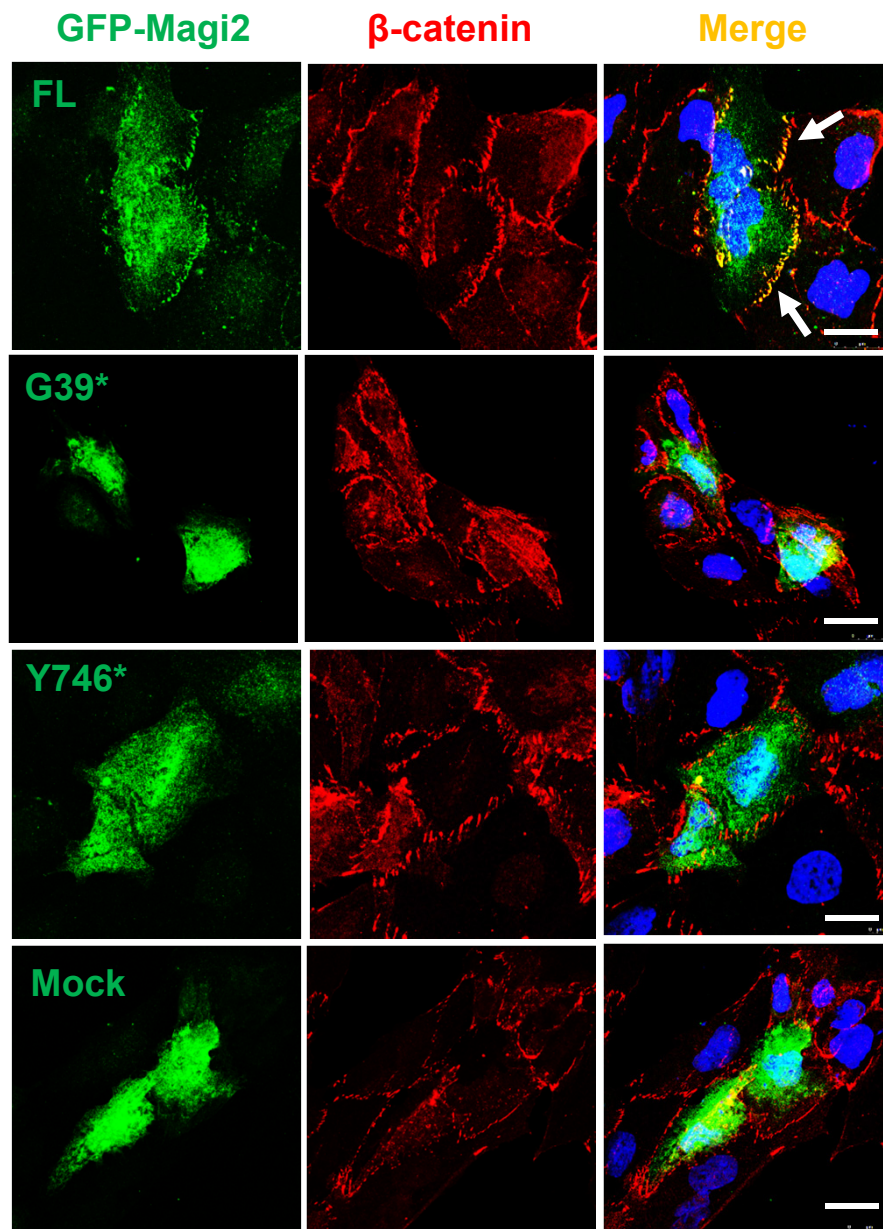

**Supplementary Figure 11. Mislocalization of overexpressed MAGI2 mutant alleles at adherens junctions in human podocytes.**

Upon overexpression, full length (FL) GFP-MAGI2 colocalizes with  $\beta$ -catenin at adherens junctions. However, overexpression of GFP-MAGI2 mutants Gly39\* and Tyr746\*, representing human disease alleles, fail to localize at adherens junctions (Scale bar 10 $\mu$ m).

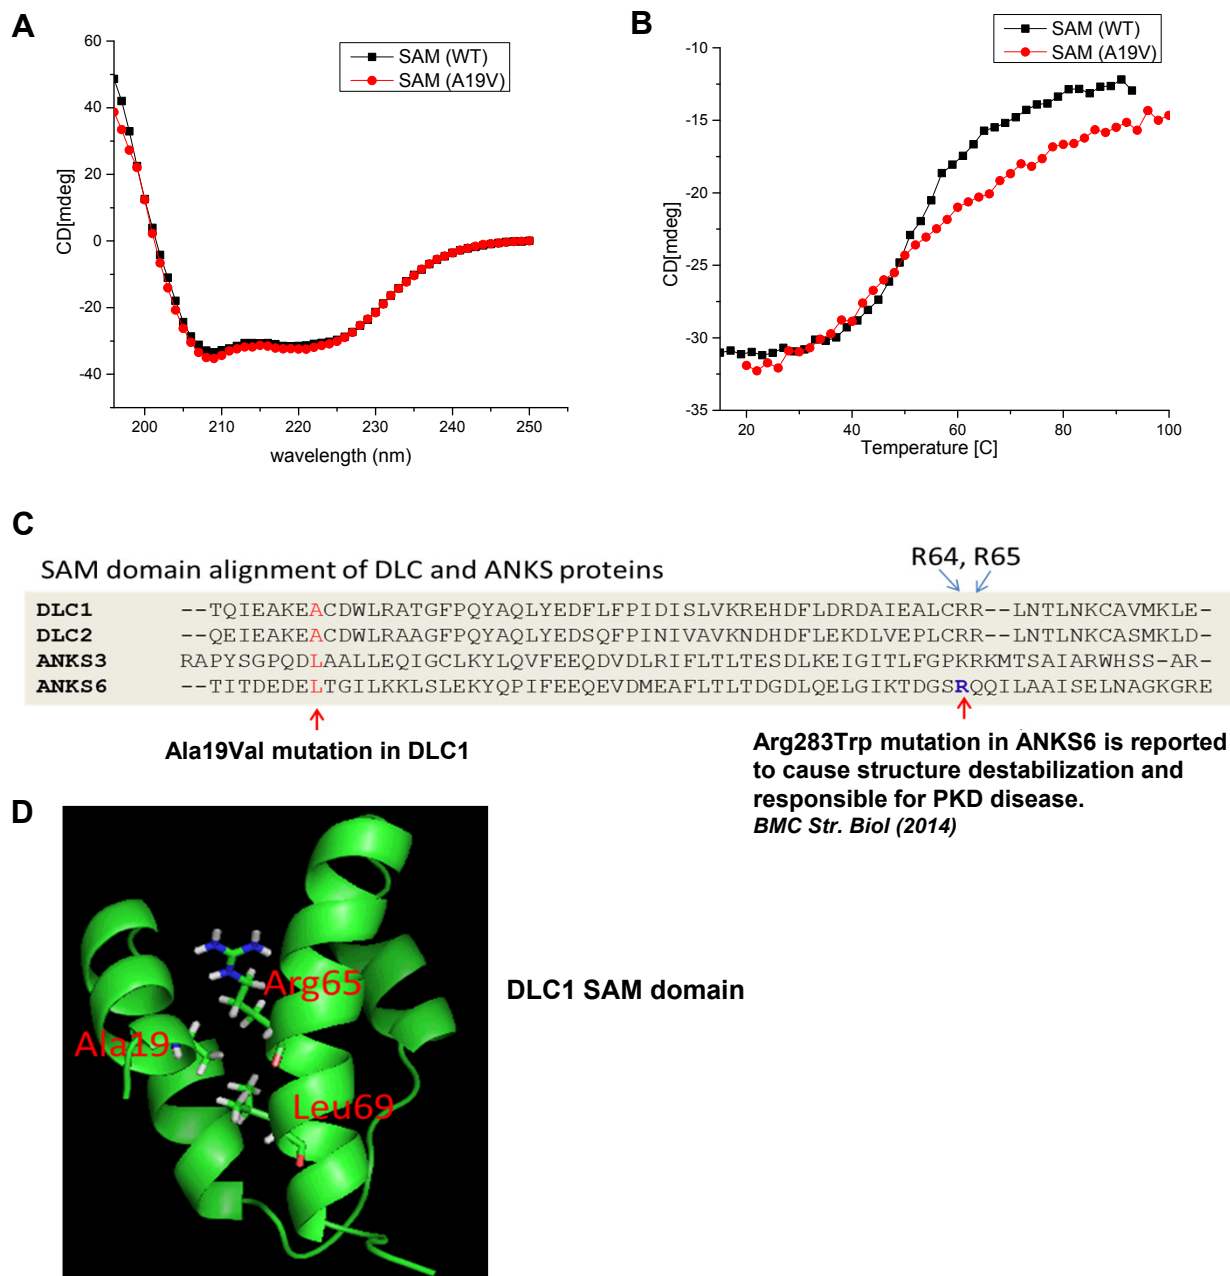

**Supplementary Figure 12. Circular Dichroism modelling depicts that Ala19Val (or Ala456Val in human protein) mutant in SAM domain of DLC1 have an effect on its polymerization.**

**(A)** CD spectra of WT and A19V SAM domain before melting.

**(B)** Thermal denaturation curves of wild type (WT) and Ala19Val SAM domains. The denaturation temperature of WT SAM domain was near to 58°C and the melting curve was sigmoidal indicating cooperative unfolding behavior. However, for A19V SAM, there was loss of cooperativity and absence of a sharp melting point.

**(C-D)** Arg283Trp mutation in ANKS6 (Arg65) and Ala456Val mutation in DLC1 (Ala19) are located in proximity in DLC1-SAM domain structure indicating a possible link of similar destabilization effect.

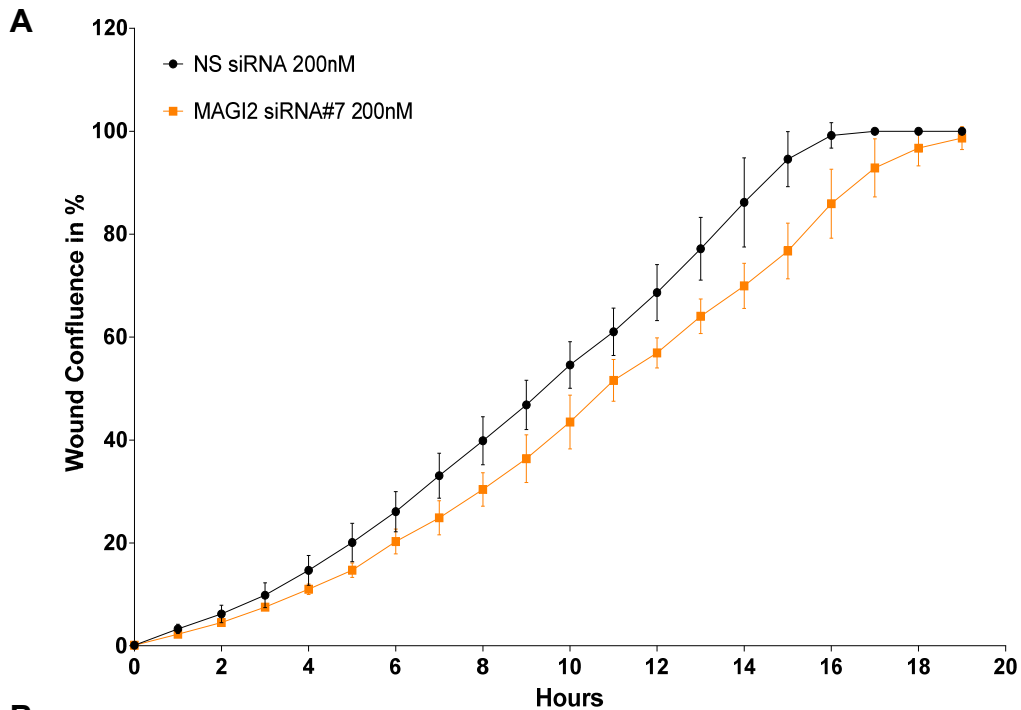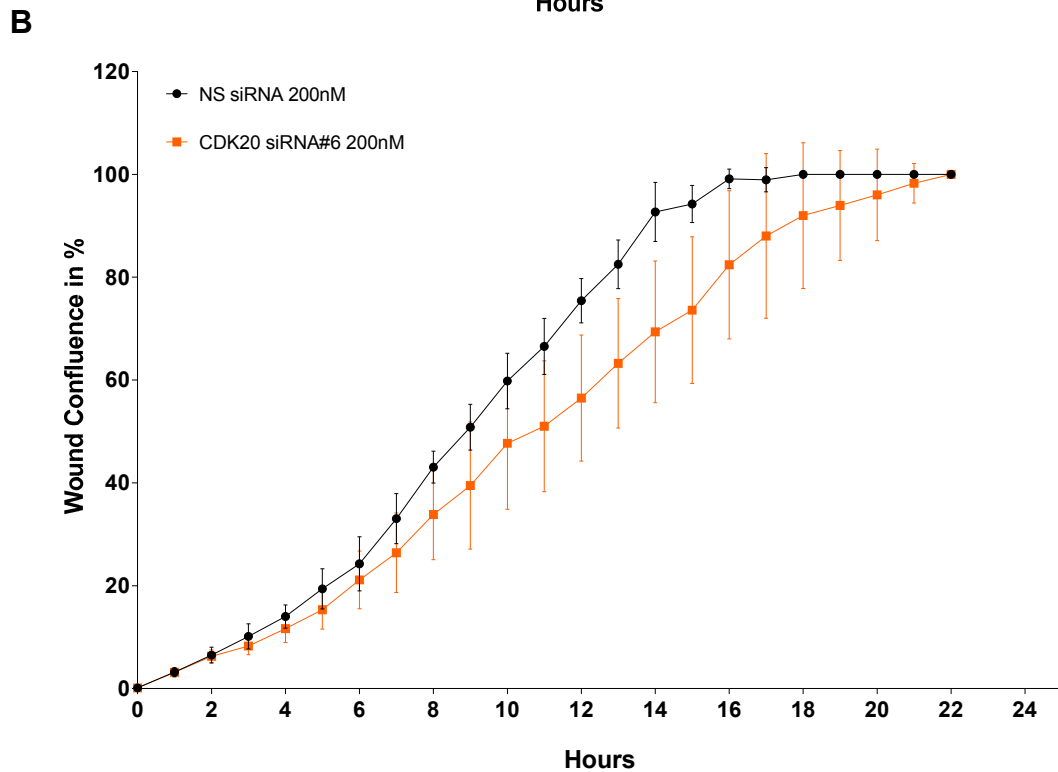

**Supplementary Figure 13. Transient knockdown of *MAGI2* or *CDK20* decreases cell migration in cultured human podocytes.**

siRNA mediated knockdown of *MAGI2* (**A**) or *CDK20* (**B**) leads to decreased podocyte migration compared with those transfected with scrambled siRNA (NS). Error bars represent SD for at least 3 independent experiments (linear regression with slope difference analysis). Migration assay was performed using the IncuCyte® system (described in Methods).

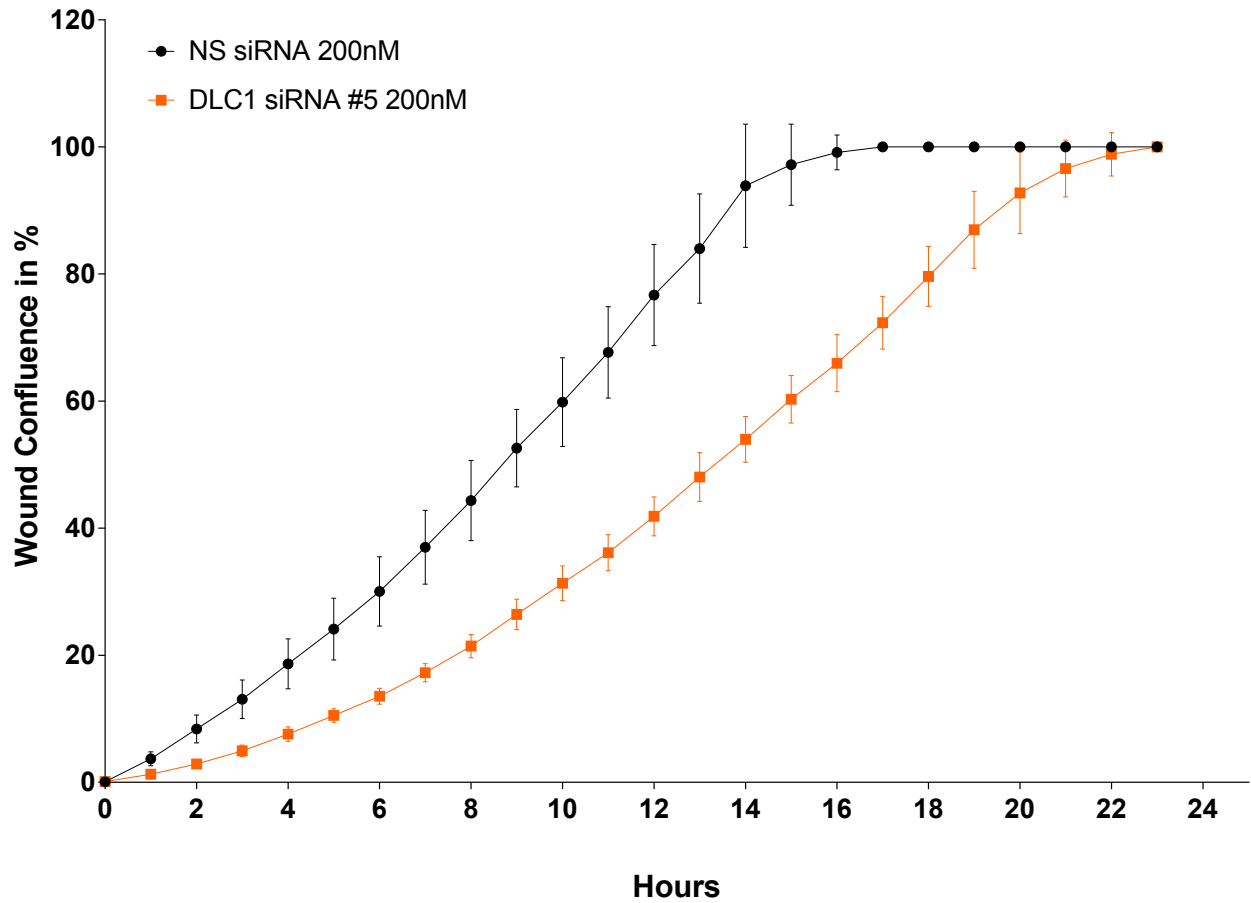

**Supplementary Figure 14. Transient knockdown of *DLC1* decreases cell migration in cultured human podocytes.**

siRNA mediated knockdown of *DLC1* leads to decreased podocyte migration compared with those transfected with scrambled siRNA (NS). Error bars represent SD for at least 3 independent experiments (linear regression with slope difference analysis). Migration assay was performed using the IncuCyte® system (described in Methods).

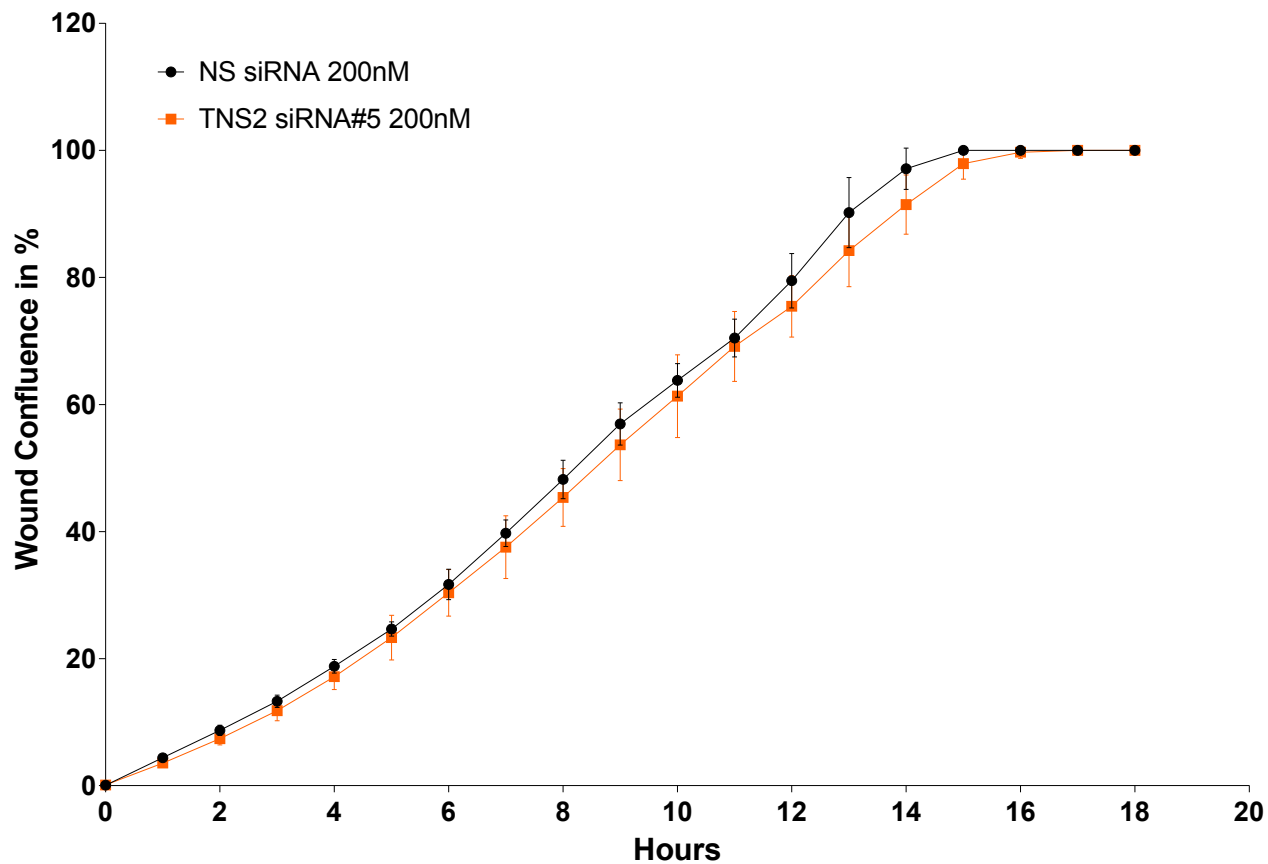

**Supplementary Figure 15. Transient knockdown of *TNS2* does not affect podocyte migration.**

Transient knockdown of *TNS2* did not show any change in podocytes migration compared with cells transfected with scrambled siRNA (NS). Error bars represent SD for at least 3 independent experiments (linear regression with slope difference analysis). Migration assay was performed using the IncuCyte® system (described in Methods).

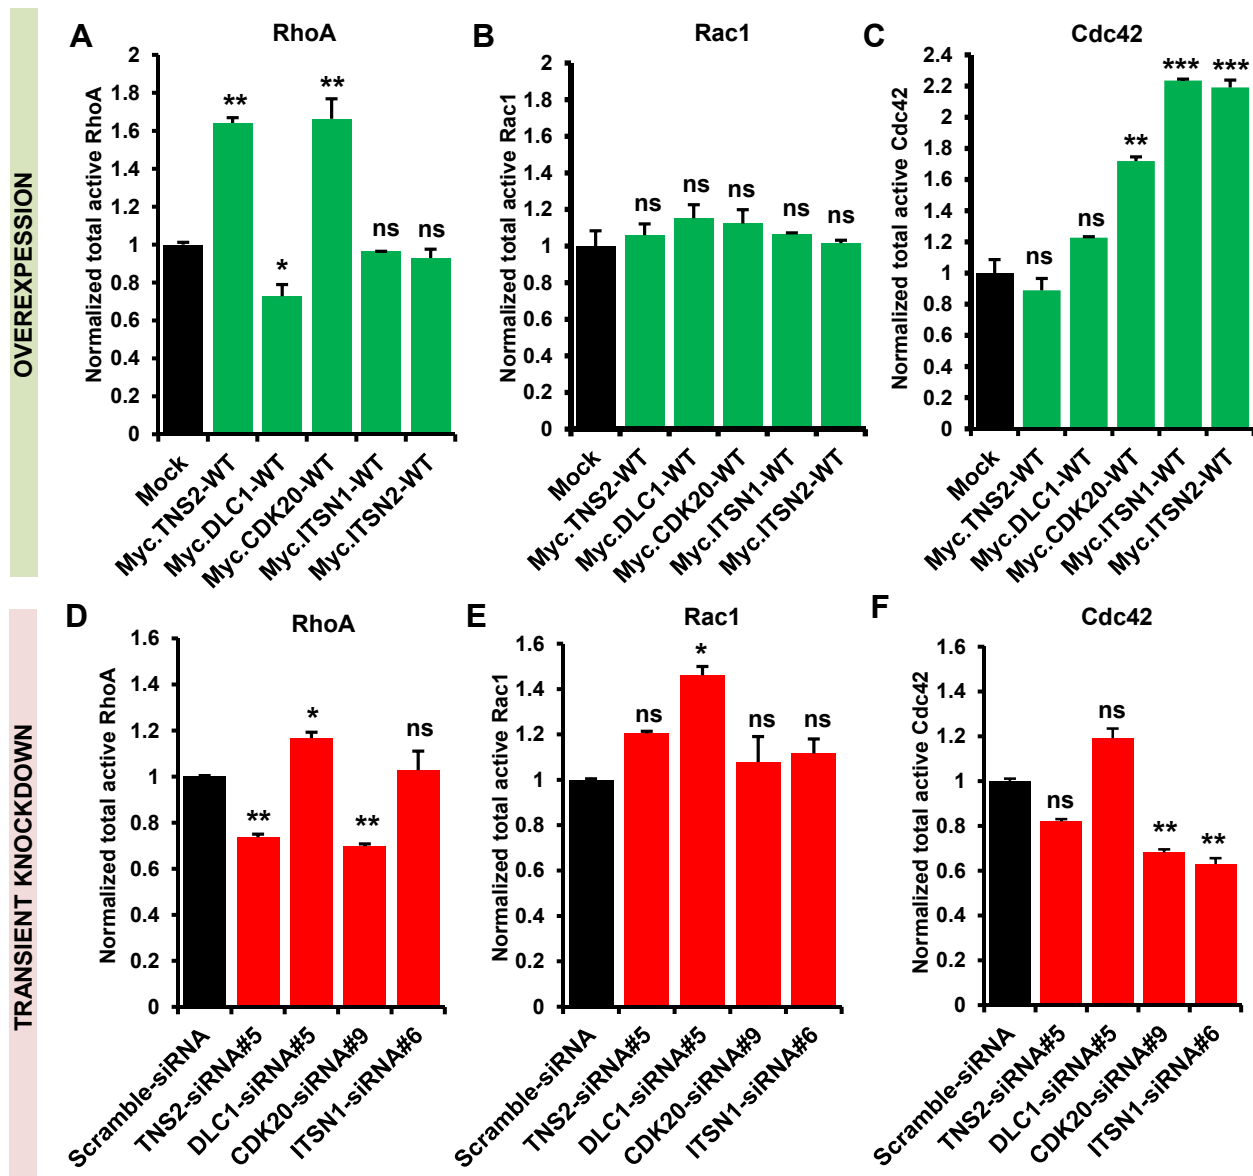

**Supplementary Figure 16. Effect of overexpression and siRNA mediated knockdown of *TNS2*, *DLC1*, *CDK20* and *ITSN* on active RhoA, Rac1 or Cdc42 in HEK293T cells, as measured by the G-LISA assay.**

(A-C) Myc-tagged *TNS2*, *DLC1*, *CDK20*, *ITSN1* or *ITSN2* constructs were overexpressed in HEK293T cells, and levels of active RhoA (A), Rac1 (B) or Cdc42 (C) were monitored using the G-LISA assay. T-test was performed versus Mock-Myc (Mock) treated control. Note that the overexpression of *TNS2*, *DLC1* or *CDK20* affects active RhoA (also shown in Fig 3b-d) while the overexpression of *CDK20*, *ITSN1* or *ITSN2* affects active CDC42.

(D-F) siRNA mediated knockdown was performed for *TNS2*, *DLC1*, *CDK20*, or *ITSN1* in HEK293T cells, and levels of active RhoA (D), Rac1 (E) or Cdc42 (F) were measured using the G-LISA assay. T-test was performed versus scrambled-siRNA treated control. Note that knockdown of *TNS2*, *DLC1* or *CDK20* affects active RhoA (also shown in Fig 3f-h) while the knockdown of *CDK20*, *ITSN1* or *ITSN2* affects active CDC42. Knockdown of *DLC1* always showed significant increase in active Rac1. Error bars are defined as the standard error of at least three independent experiments. One-way ANOVA with Dunnet's post hoc test was performed either for mock control versus WT (A-C) or scramble knockdown versus each gene-specific siRNA (D-F). Data are presented as the mean  $\pm$  SEM. \*  $P < 0.05$ , \*\*  $P < 0.01$ , \*\*\*  $P < 0.001$ . ns, non significant.



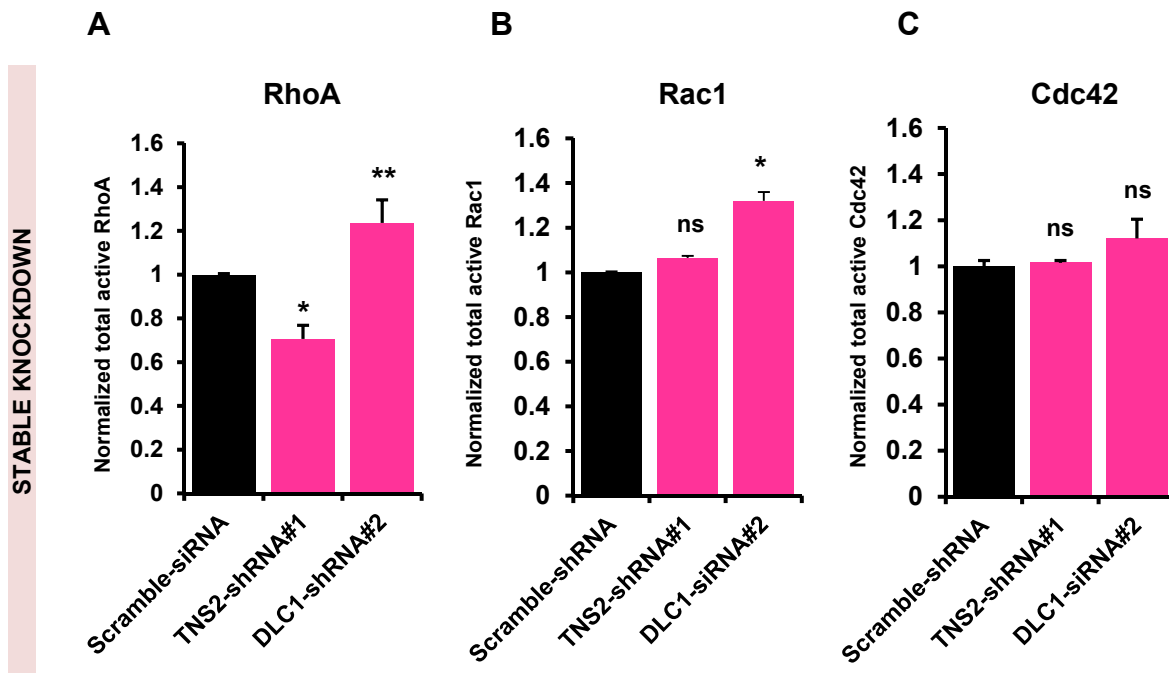

**Supplementary Figure 17. Effect of stable knockdown of *TNS2* and *DLC1* on active RhoA, Rac1 or Cdc42 in HEK293T cells, as measured by the G-LISA assay.**

(A-C) shRNA-mediated knockdown was performed for *TNS2* or *DLC1* in HEK293T cells, and levels of active RhoA (A), Rac1 (B) or Cdc42 (C) were measured using the G-LISA assay. T-test was performed versus scrambled-siRNA treated control. Note that knockdown of *TNS2* decreases active RhoA and knockdown of *DLC1* increases active RhoA (also shown in **Supplementary Fig. 16**). Knockdown of *DLC1* showed a significant increase in active Rac1.

Error bars are defined as the standard error of at least three independent experiments. One-way ANOVA with Dunnet's post hoc test was performed for scramble control *versus* TNS2-shRNA#1 or DLC-shRNA#2. Data are presented as the mean  $\pm$  SEM. \*  $P < 0.05$ , \*\*  $P < 0.01$ . ns, non significant.

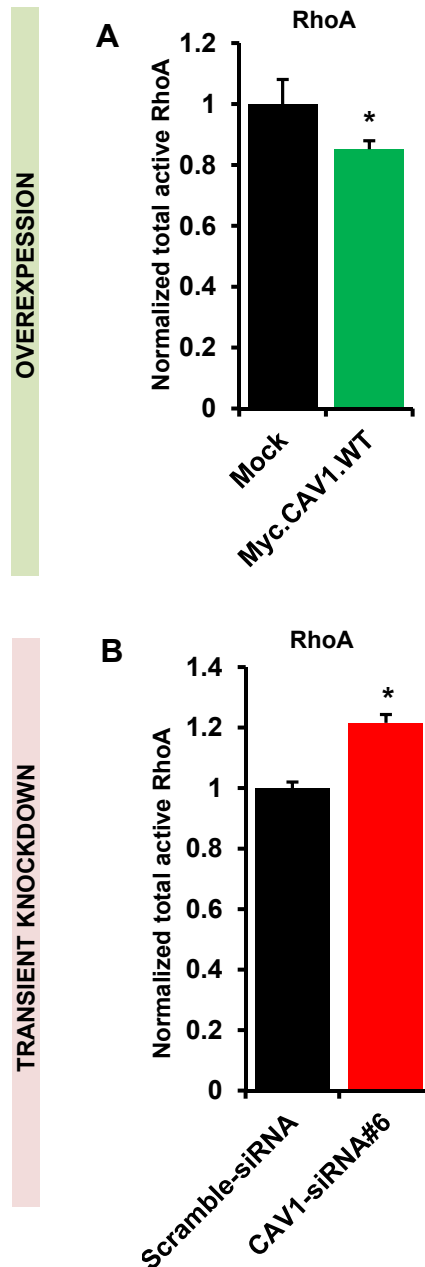

**Supplementary Figure 18. Effect of overexpression and siRNA mediated knockdown of *CAV1* on active RhoA in HEK293T cells, as measured using the G-LISA assay.**

(A) Myc-tagged *CAV1* construct was overexpressed in HEK293T cells, and levels of active RhoA were measured using the G-LISA assay. One-way ANOVA with Dunnet's post hoc test was performed for mock control *versus* *CAV1*-WT.

(B) siRNA-mediated knockdown was performed for *CAV1* in HEK293T cells, and levels of active RhoA were measured using the G-LISA assay. One-way ANOVA with Dunnet's post hoc test was performed for scramble control *versus* *CAV1*-siRNA#6.\*  $P < 0.05$ . Error bars are defined as the standard error of at least three independent experiments.

Note that the overexpression of *CAV1* decreased active RhoA, whereas the knockdown of *CAV1* increased active RhoA.

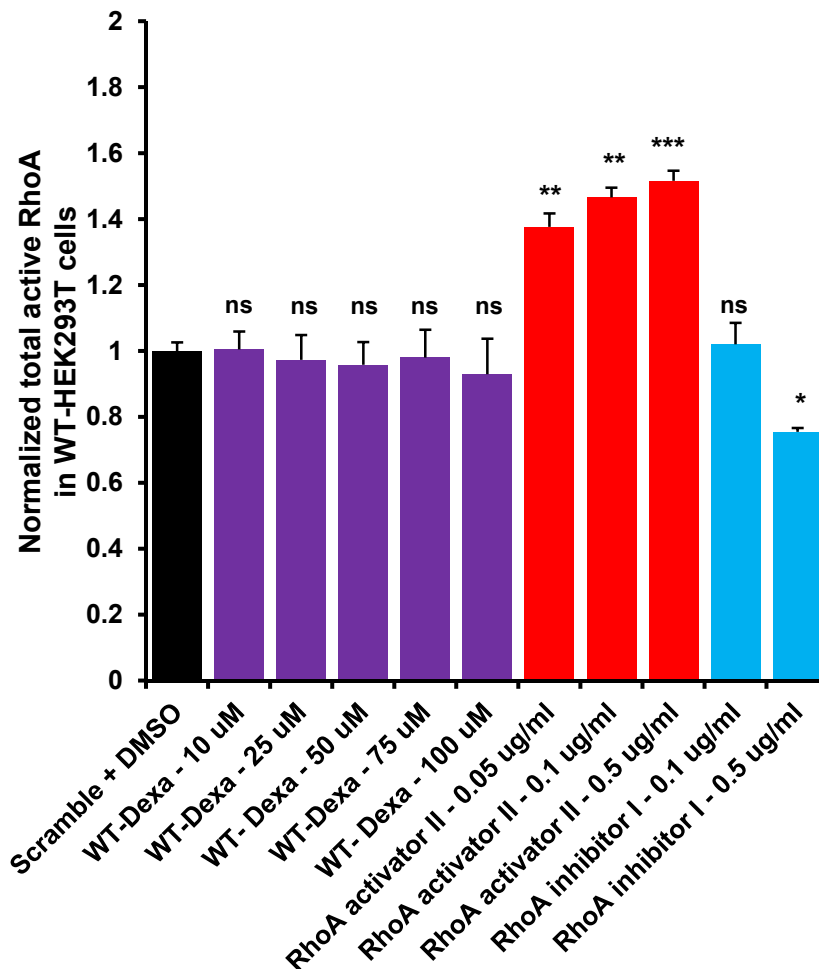

**Supplementary Figure 19. Effect of different concentrations of dexamethasone on wild type HEK293T cells as measured using the G-LISA assay.**

Wild type HEK293T cells were treated with different dosages of dexamethasone (Dexa) (10µM, 25µM, 50µM, 75µM and 100µM) and levels of active RhoA were measured using the G-LISA assay. One-way ANOVA with Dunnet's post hoc test was performed *versus* DMSO (10µM) treated control. \* P < 0.05, \*\* P < 0.01, \*\*\* P < 0.001. ns, non significant; WT, wild type.

Treatments with RhoA activators (red) and RhoA inhibitors (blue) were used as positive controls.

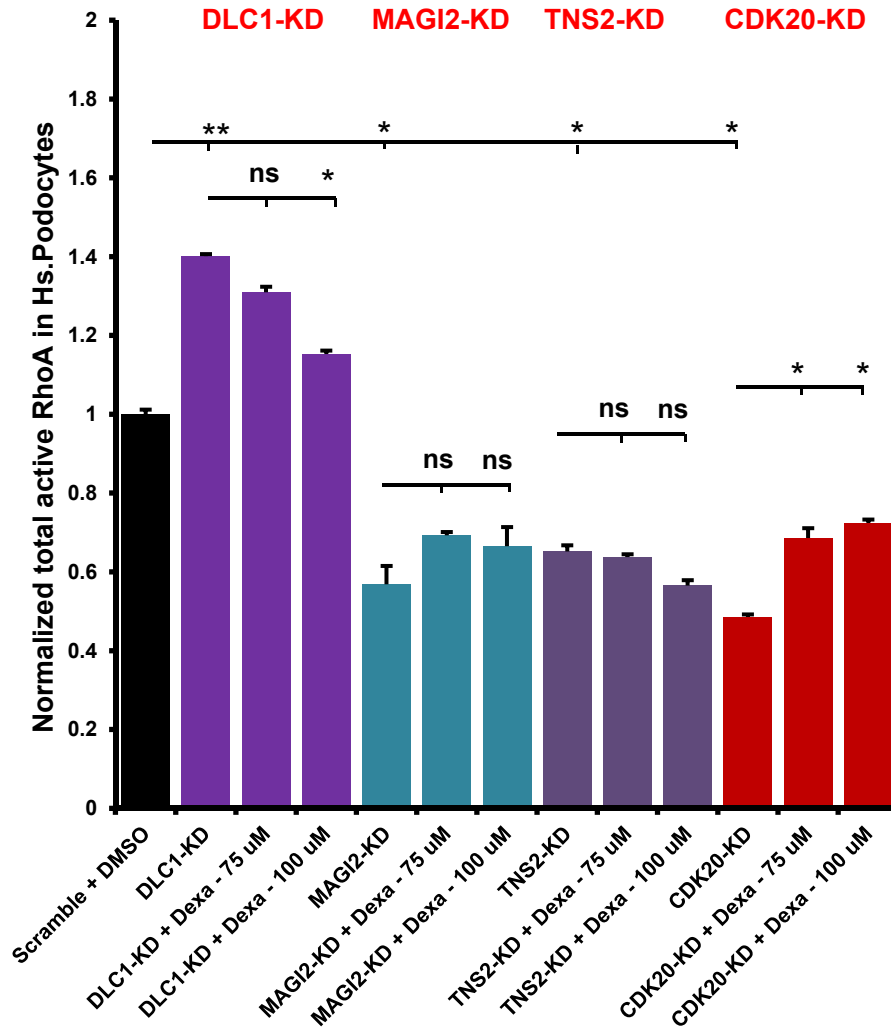

**Supplementary Figure 20. Effect of two different concentrations of dexamethasone (75  $\mu$ M and 100  $\mu$ M) on RhoA activation upon knockdown of *DLC1*, *MAGI2*, *TNS2* or *CDK20* in human podocytes, as measured using the G-LISA assay.**

The change in active RhoA upon knockdown of *DLC1* or *CDK20*, but not *MAGI2*, or *TNS2* was found reversible by treatment of human podocytes with 100  $\mu$ M dexamethasone. Error bars are defined as the standard error of at least three independent experiments. One-way ANOVA with Dunnett's post hoc test was performed *versus* DMSO (10  $\mu$ M) treated control. Data are presented as the mean  $\pm$  SEM. \* P < 0.05, \*\* P < 0.01. ns, non significant.

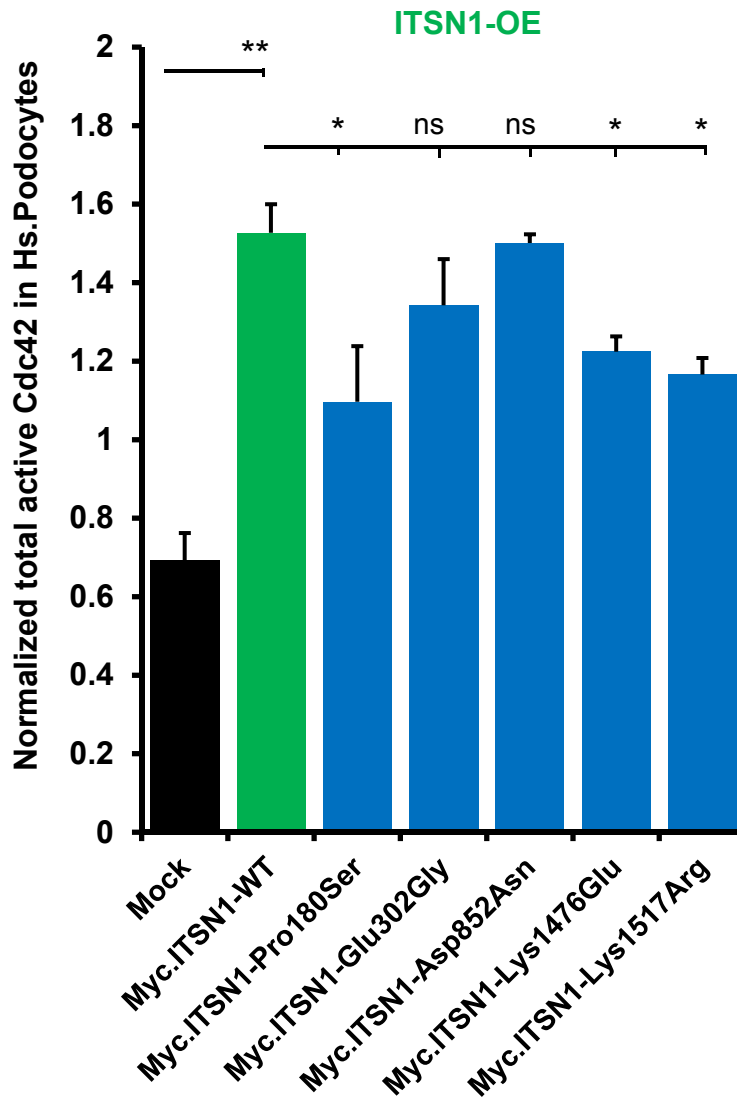

**Supplementary Figure 21. Effect of overexpression in *ITSN1*, wild type (WT) and mutants, on Cdc42 activation in human podocytes, as measured using the G-LISA assay.**

Myc-tagged *ITSN1*-WT increased active Cdc42 levels upon overexpression in human podocyte as compared to mock control. However, 3 out of 5 *ITSN1* mutants from pTSNS patients failed to show any significant increase in active Cdc42 upon overexpression. One-way ANOVA with Dunnet's post hoc test was performed *versus* mock control or *ITSN1*-WT. Data are presented as the mean  $\pm$  SEM. \*  $P < 0.05$ , \*\*  $P < 0.01$ . ns, non significant.

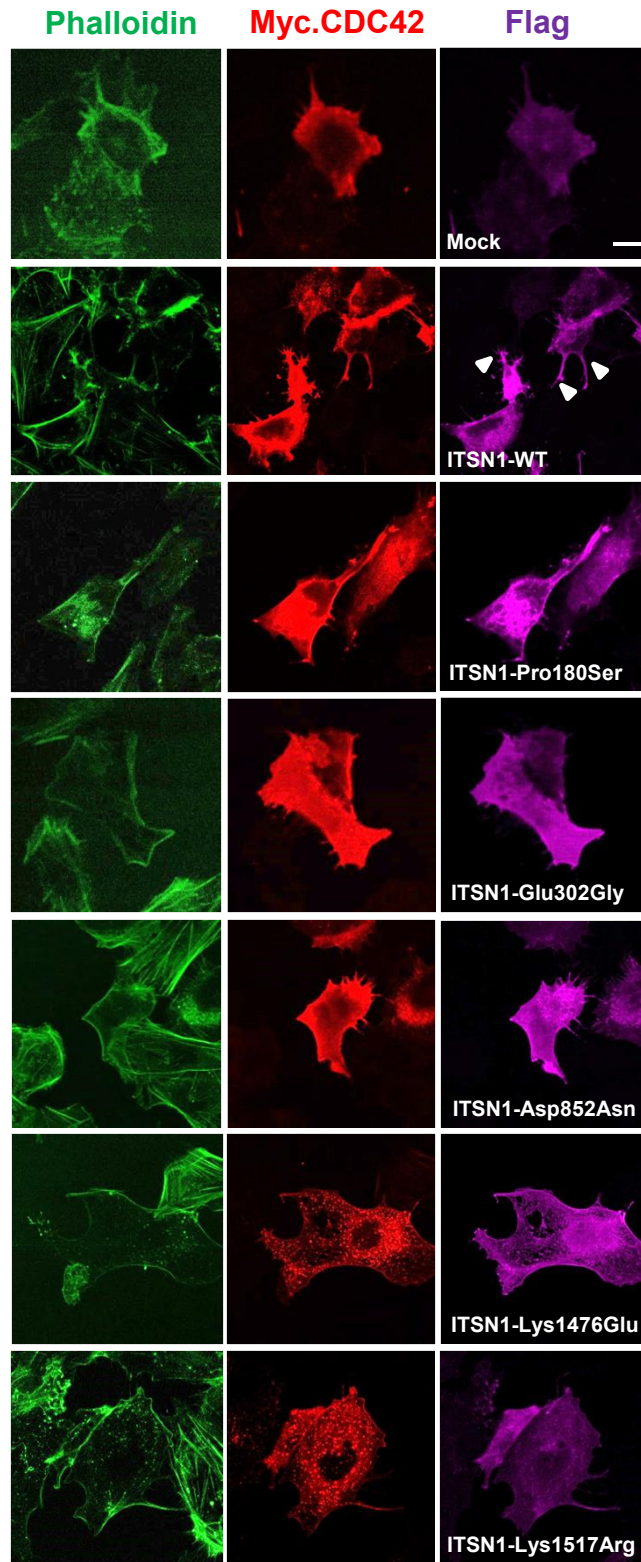

**Supplementary Figure 22. Filopodia induction in cultured human podocytes upon overexpression of *ITSN1*, wild type (WT) and mutants.**

Human podocytes were transfected with Myc-Cdc42 and FLAG tagged WT *ITSN1*, 5 mutants (Pro180Ser, Glu302Gly, Asp852Asn, Lys1476Glu and Lys1517Arg) or mock-transfected. Cells were stained with Phalloidin (green), anti-Myc antibodies (red) or anti-FLAG antibodies (pink). Immunofluorescence images showed extensive filopodia induction in WT *ITSN1*-L-transfected cells (white arrowheads) whereas overexpression of *ITSN2* mutants representing mutations in patients with pTSNS lacked strong filopodia formation. Representative images are shown. (Scale bar 50µm).

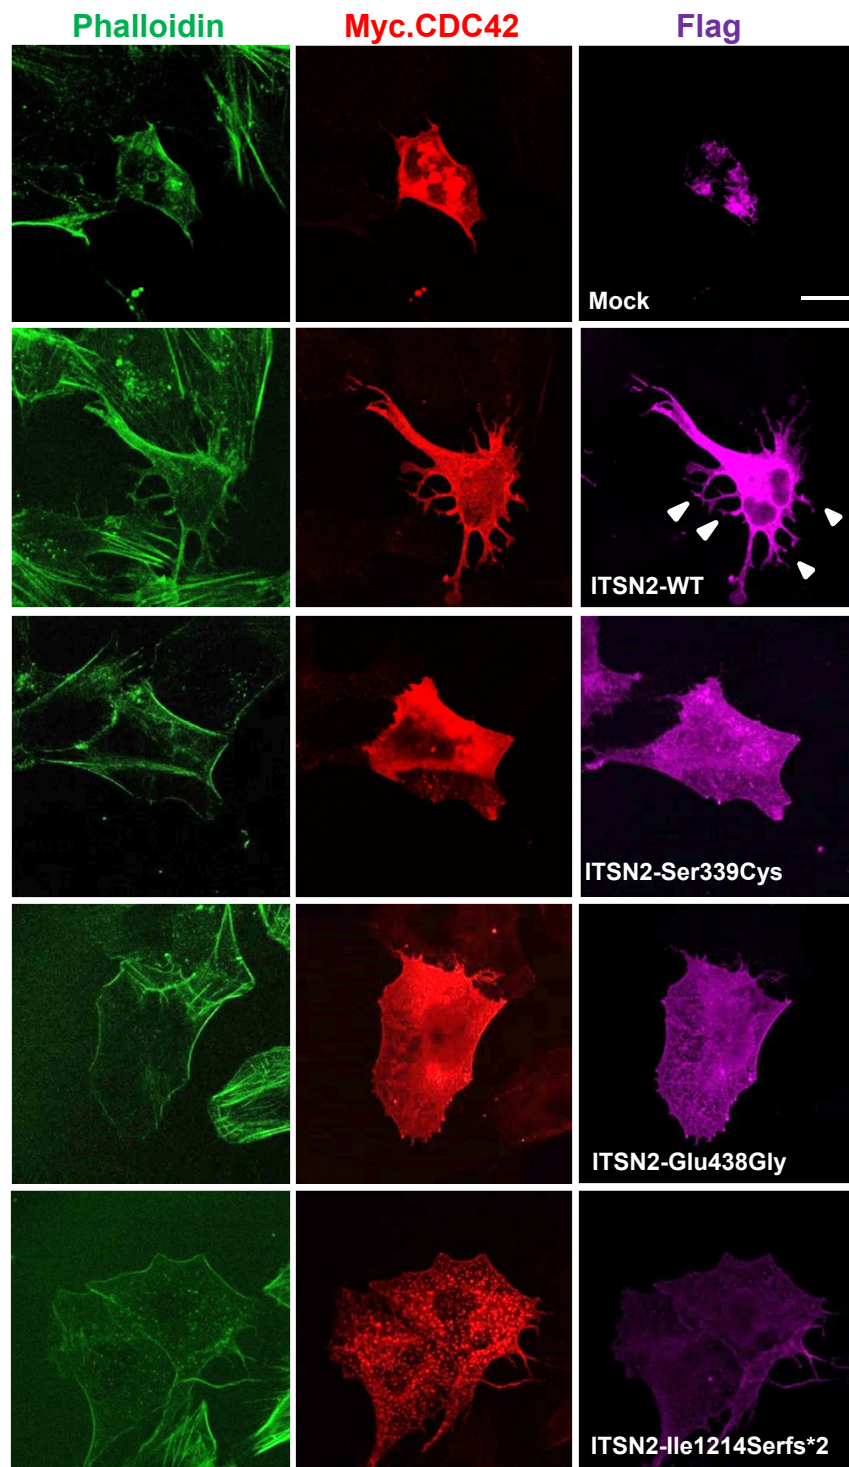

**Supplementary Figure 23. Filopodia induction in cultured human podocytes upon overexpression of *ITSN2*, wild type (WT) and mutants.**

Human podocytes were transfected with Myc-Cdc42 and FLAG tagged WT *ITSN2*-L, or 3 mutants from patients with pTSNS (Ser339Cys, Glu438Gly and Ile1214Serfs\*2) or mock-transfected. Cells were stained with Phalloidin (green), anti-Myc antibodies (red), or anti-FLAG antibodies (pink). Immunofluorescence images showed extensive filopodia induction in WT *ITSN2*-L-transfected cells (white arrowheads). Representative images are shown (Scale bar 50 $\mu$ m).

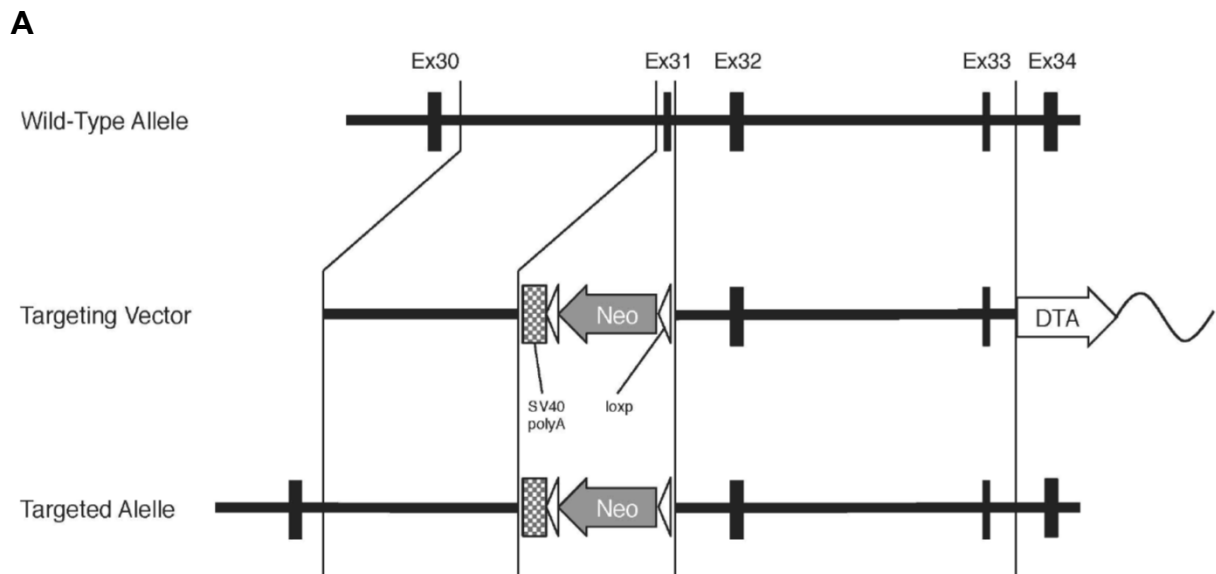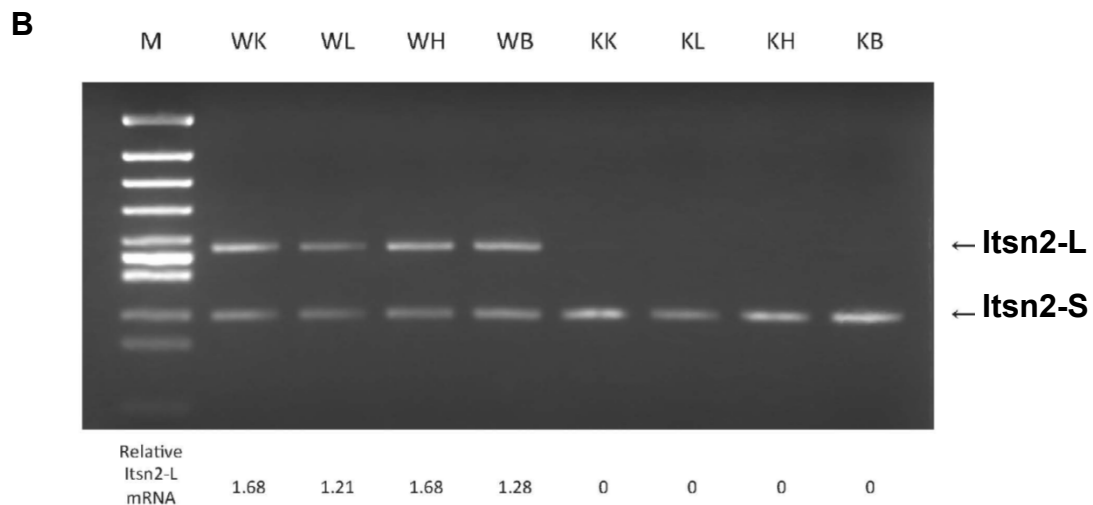

**Supplementary Figure 24. Generation of Itsn2-L knockout (KO) mice.**

(A) The targeting vector was designed to generate a conventional KO mouse.

(B) *Itsn2* mRNA of various organs were analyzed by RT-PCR. Reverse primers were designed for *Itsn2* short (*Itsn2-S*) and long (*Itsn2-L*). The bands of *Itsn2-L* were not detected in *Itsn2*<sup>L-/L-</sup> mice. The mRNA levels of *Itsn2-L* relative to those of *Itsn2-S* are shown.

M, size marker; WK, WT kidney; WL, WT liver; WH, WT heart; WB, WT brain; KK, KO kidney; KL, KO liver; KH, KO heart; KB, KO brain.



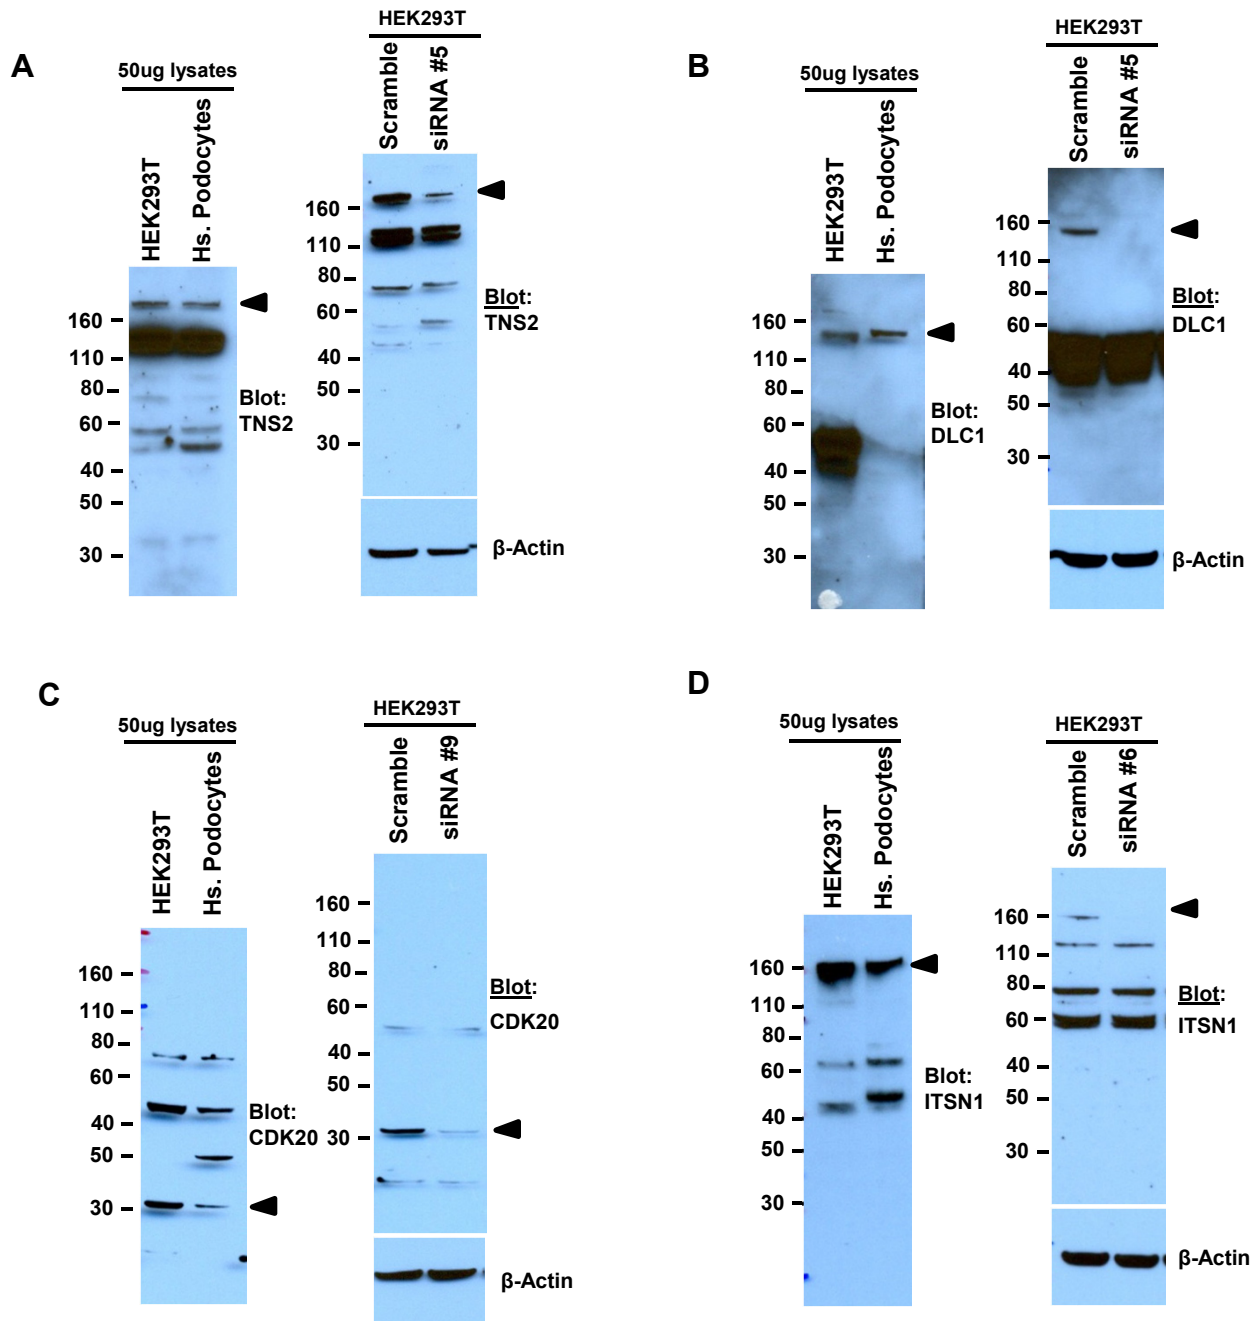

**Supplementary Figure 25. Characterization of antibodies against TNS2 (A), DLC1 (B), CDK20 (C) and ITSN1 (D).**

*Left panels:* Endogenous expression of each protein in 50  $\mu$ g of HEK293T and human podocyte cell lysates. Arrow heads indicate the relative positions of the respective proteins.

*Right panels:* siRNA-mediated knockdowns in HEK293T cells confirm the specificity of four antibodies against TNS2, DLC1, CDK20, and ITSN1 respectively in HEK293T cells. Arrow heads indicate the relative positions of the respective protein. (TNS2: Hafizi S. *et al.* 2005; DLC1, Li G. *et al.* 2011; CDK20, Novus-NBP1-91214, rabbit polyclonal; ITSN1, abcam-ab118262 rabbit polyclonal)

**A**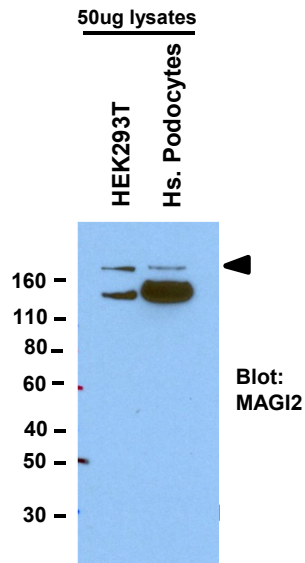**B**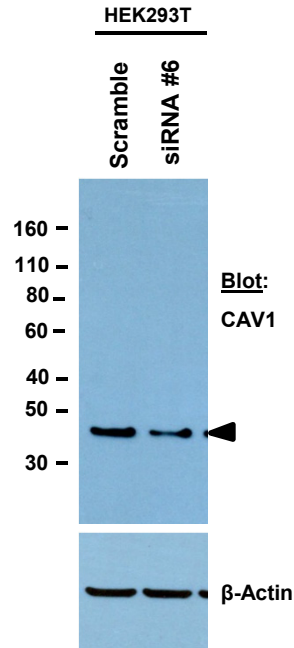

**Supplementary Figure 26. Characterization of antibodies against MAGI2 and CAV1.**

(A) Endogenous expression of MAGI2 in 50 µg of HEK293T and human podocyte cell lysates. Arrow head indicate the expected size of the protein.

(MAGI2- Gee HY et al; 2009)

(B) siRNA-mediated knockdown in HEK293T cells confirms the specificity of antibody against CAV1. Arrow head indicate the relative size of the protein.

(CAV1: Cell Signaling, rabbit polyclonal)

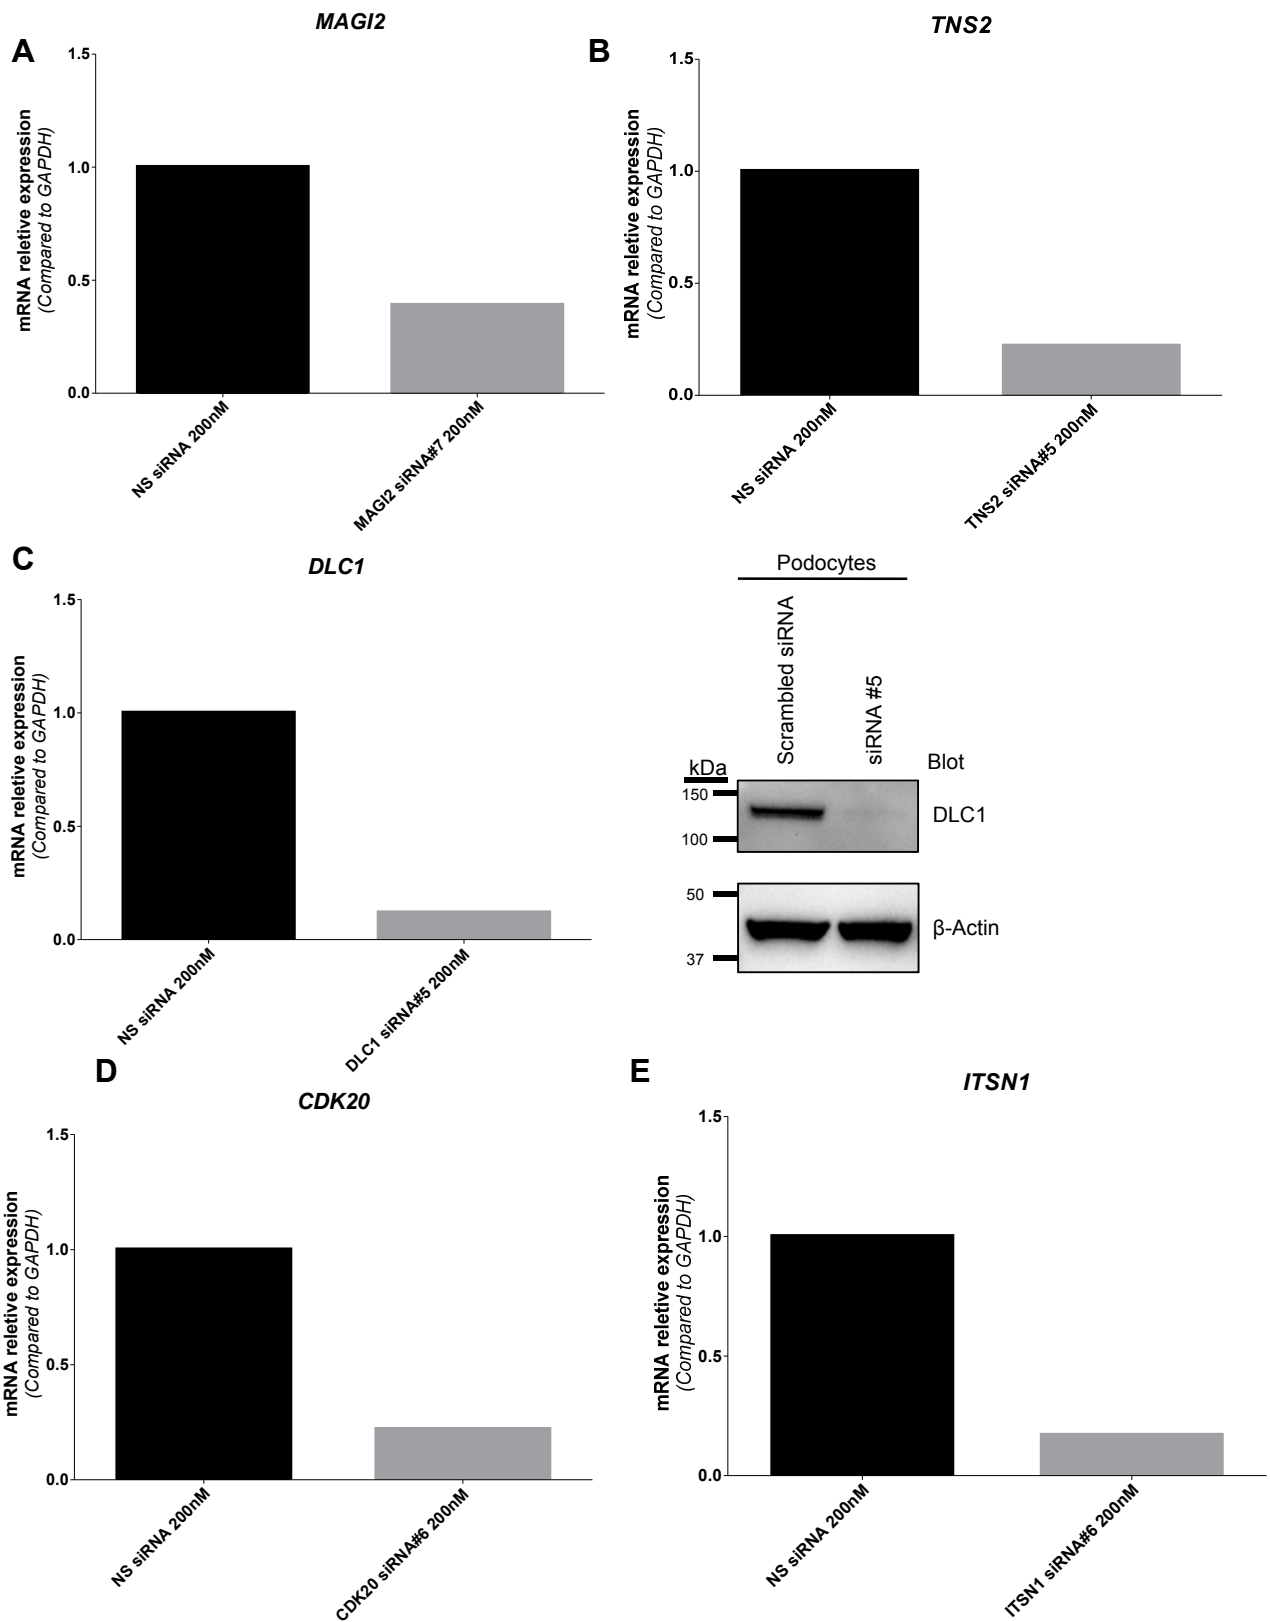

**Supplementary Figure 27. Characterization of efficiency of transient knockdown of *MAGI2* (A), *TNS2* (B), *DLC1* (C), *CDK20* (D) and *ITSN1* (E) in undifferentiated human podocytes.**

mRNA levels were measured by real-time PCR using TaqMan probes for *MAGI2* (A), *TNS2* (B), *DLC1* (C), *CDK20* (D), and *ITSN1* (E), respectively, with *GAPDH* as control. Knockdown of *DLC1* was also confirmed by western blotting with antibody against *DLC1* (C).

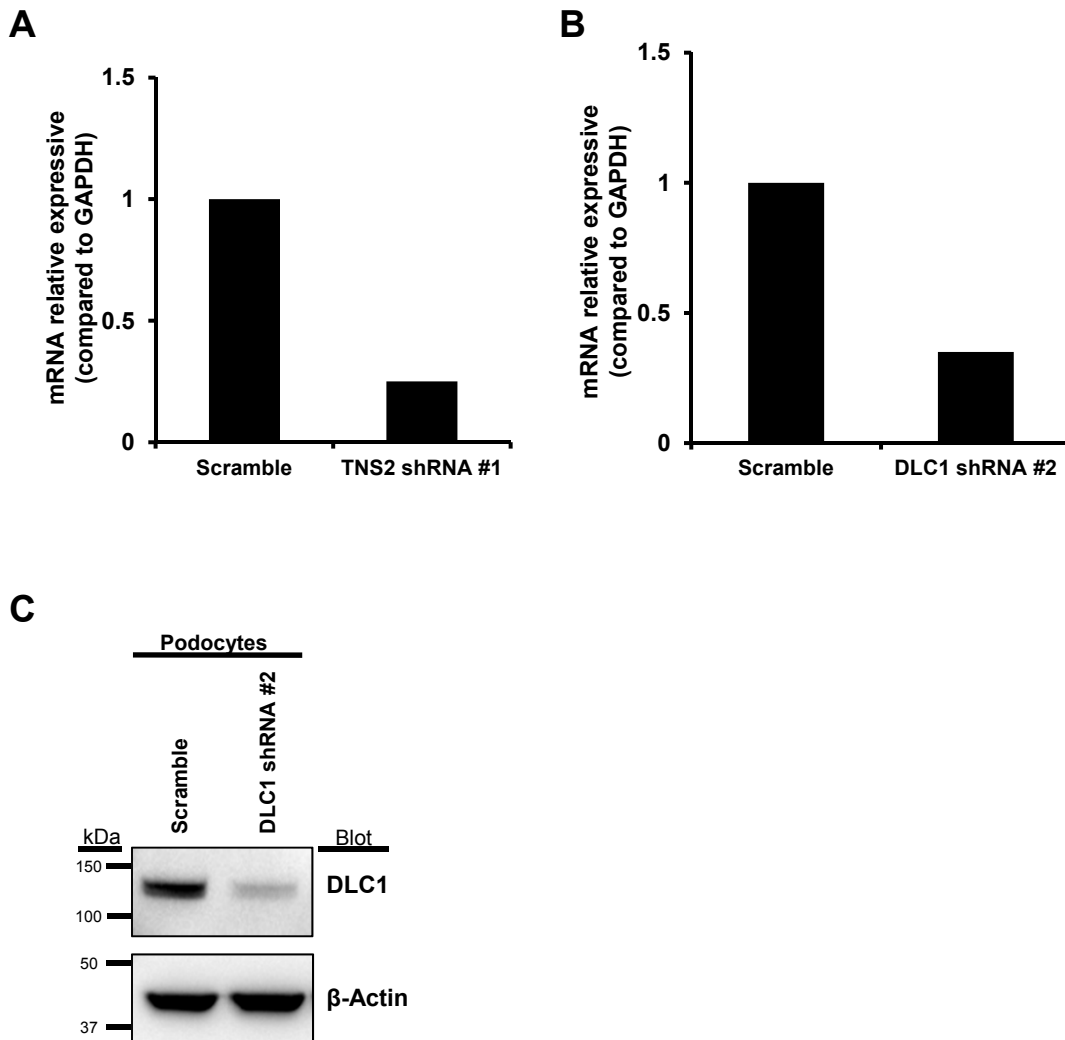

**Supplementary Figure 28. Characterization of efficiency of shRNA-mediated stable knockdown of *TNS2* and *DLC1* in human podocytes.**

**(A-B)** mRNA levels were measured by real-time PCR using TaqMan probes for *TNS2* **(A)**, and *DLC1* **(B)**, respectively, with *GAPDH* as control.

**(C)** Knockdown of *DLC1* was also confirmed by western blotting with antibody against *DLC1*.

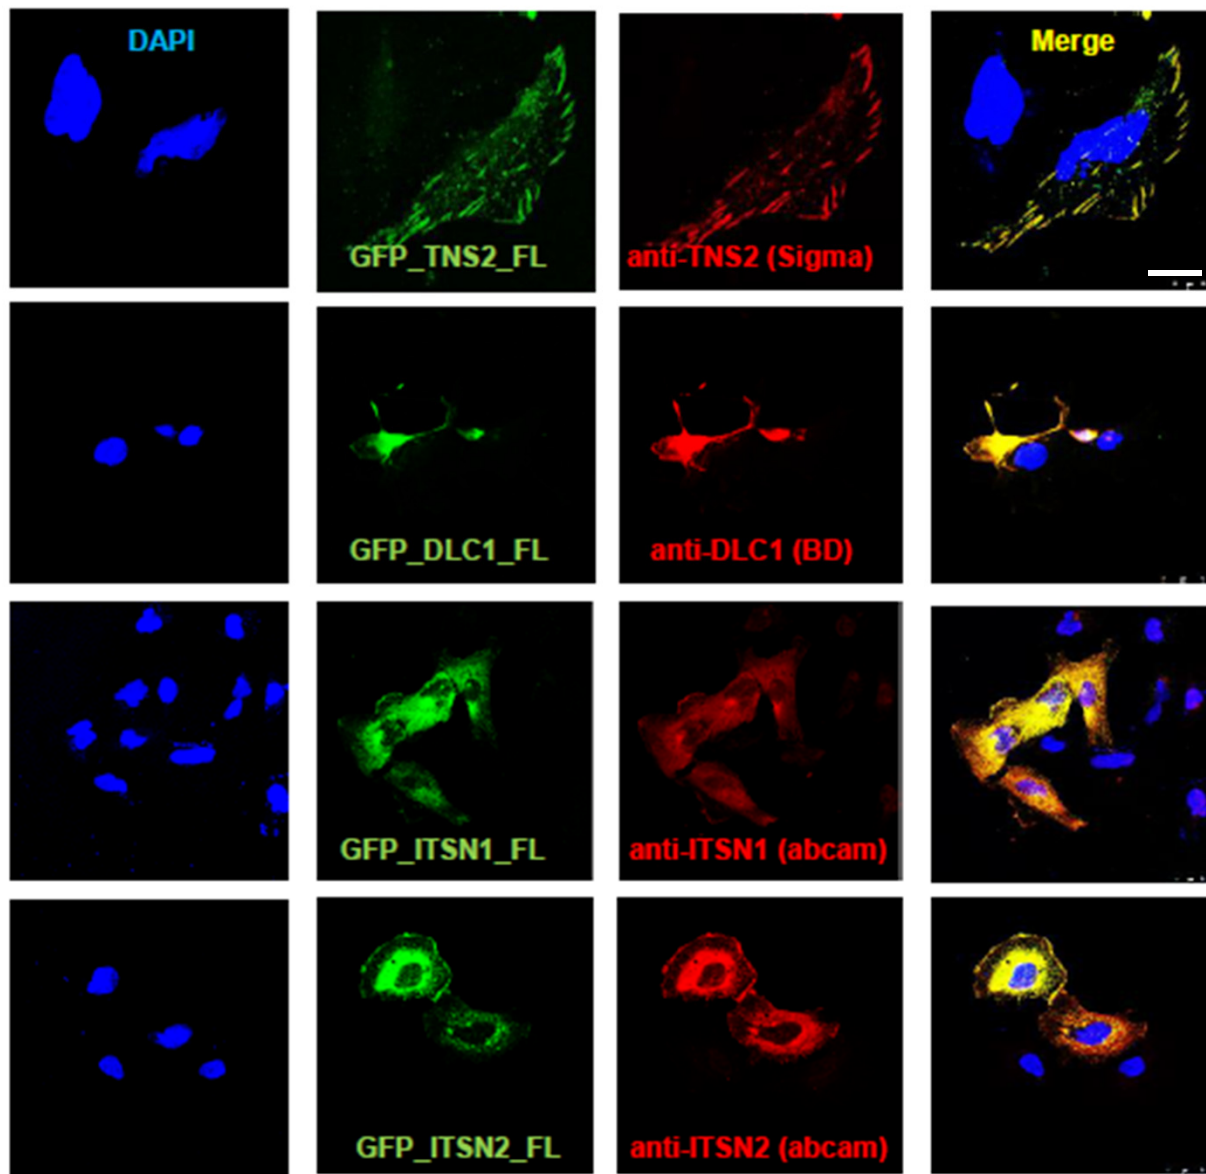

**Supplementary Figure 29. Characterization of antibodies against TNS2, DLC1, ITSN1 and ITSN2 with immunofluorescence.**

Immortalized human podocytes were seeded on cover-glasses and transfected with 4ug of GFP tagged full length *TNS2*, *DLC1*, *ITSN1*, *ITSN2*, *CDK20*, and *CAV1*. 24 hours post transfection cells were stained with the respective antibodies (Scale bar 10µm).

Anti-TNS2 (Sigma, HPA034659), anti-DLC1 (BD Clone 3/DLC-1), anti-ITSN1 (abcam ab118262), anti-ITSN2 (abcam ab176592).

**Supplementary Table 1: Recessive mutations detected in genes *MAGI2*, *TNS2*, *DLC1*, *CDK20*, *ITSN1* and *ITSN2* in individuals with NS.**

| Family Individual   | Ethnic origin | Parental consanguinity | Nucleotide alteration (s) | Alteration(s) in coding sequence <sup>a</sup> | Exon (segregation)           | Amino acid sequence conservation           | GnomAD Allele count (zygosity)             | Age at Onset | Kidney disease | Age at ESKD | Treatment and renal transplantation                                            | Histology (at age) | Extrarenal manifestations                                                                                                                                                      |
|---------------------|---------------|------------------------|---------------------------|-----------------------------------------------|------------------------------|--------------------------------------------|--------------------------------------------|--------------|----------------|-------------|--------------------------------------------------------------------------------|--------------------|--------------------------------------------------------------------------------------------------------------------------------------------------------------------------------|
| <b><i>MAGI2</i></b> |               |                        |                           |                                               |                              |                                            |                                            |              |                |             |                                                                                |                    |                                                                                                                                                                                |
| A5146-21            | Arab (Iraq)   | Yes                    | c.115G>T                  | p.Gly39*                                      | 1 (HOM, M, P)                | NA                                         | NP                                         | 4 yr         | SSNS           | ND          | partial response to Pred/CsA                                                   | FSGS (4 yr)        | Hydrocephalus                                                                                                                                                                  |
| B91 (1302/11)       | Europe        | No                     | c.2238C>G                 | p.Tyr746*                                     | 12 (HOM, maternal isodisomy) | NA                                         | NP                                         | 8 wks        | CNS            | ND          | ND                                                                             | FSGS (20 mo)       | Microcephaly, severe global developmental delay, cryptorchidism, hypothyroidism, gastroesophageal reflux (IUGR and postnatal short stature - probably attributable to matUPD7) |
| <b><i>TNS2</i></b>  |               |                        |                           |                                               |                              |                                            |                                            |              |                |             |                                                                                |                    |                                                                                                                                                                                |
| A1358-21            | Turkey        | Yes                    | c.875G>A                  | p.Arg292Gln                                   | 11 (HOM, ND)                 | <i>C. intestinalis</i>                     | NP                                         | 7 yr         | NS             | ND          | no treatment attempt                                                           | MCNS (7 yr)        | Asthma                                                                                                                                                                         |
| A283-21             | Europe        | No                     | c.1334G>A<br>c.3382A>G    | p.Arg445Gln<br>p.Thr1128Ala                   | 17 (het, M)<br>20 (het, P)   | <i>D. rerio</i><br><i>G. gallus</i>        | 68 / 277,108 (het)<br>1522 / 240,618 (het) | 7 yr         | SDNS           | ND          | partial response to CsA; complete remission to MMF (no relapse during 2 years) | MCNS (7 yr)        | ND                                                                                                                                                                             |
| 2605                | Nigeria       | No                     | c.1675G>A                 | p. Gly559Arg                                  | 17 (HOM, ND)                 | <i>D. rerio</i>                            | 34 / 160,586 (het)                         | ND           | SSNS           | ND          | partial response to Pred                                                       | FSGS (ND)          | Hypertension                                                                                                                                                                   |
| A3775-21            | India         | No                     | c.2574C>G                 | p.Ile858Met                                   | 18 (HOM, ND)                 | <i>C. elegans</i>                          | 186 / 232,392 (het)                        | 2 yr         | SSNS           | ND          | complete, remission with steroids                                              | DMS (2 yr)         | ND                                                                                                                                                                             |
| A1640-21            | India         | No                     | c.1693C>T<br>c.2574C>G    | p.Arg565Trp<br>p.Ile858Met                    | 18 (het, P)<br>18 (het, M)   | <i>D. rerio</i><br><i>C. elegans</i>       | 22 / 119,318 (het)<br>186 / 232,392 (het)  | 3 yr         | SDNS           | ND          | complete remission to CsA, MMF, CTX and RTX                                    | MCNS (3 yr)        | Short stature                                                                                                                                                                  |
| <b><i>DLC1</i></b>  |               |                        |                           |                                               |                              |                                            |                                            |              |                |             |                                                                                |                    |                                                                                                                                                                                |
| A548-21             | Europe        | No                     | c.29G>A<br>c.128G>C       | p.Trp10*<br>p.Ser43Thr                        | 2 (het, ND)<br>2 (het, ND)   | NA<br><i>G. gallus</i>                     | NP<br>2 / 246,110 (het)                    | 56 yr        | SRNS           | 62 yr       | Dialysis at 62 yrs and 1 <sup>st</sup> transplant at 64 yrs of age!            | FSGS (56 yr)       | ND                                                                                                                                                                             |
| A4967-21            | Arab          | No                     | c.539A>C<br>c.4073A>C     | p.Glu180Ala<br>p.Lys1358Thr                   | 2 (het, M)<br>15 (het, P)    | <i>G. gallus</i><br><i>C. intestinalis</i> | NP<br>NP                                   | 7 yr         | SRNS           | 7 yr        | no response to Methyl-Pred/Pred                                                | FSGS (7 yr)        | HT, seizures (mild brain atrophy with dilated ventricles), Nephritis                                                                                                           |

|              |        |     |                          |                                 |                              |                                             |                                          |               |                      |          |                                                                                                                     |                              |                                        |
|--------------|--------|-----|--------------------------|---------------------------------|------------------------------|---------------------------------------------|------------------------------------------|---------------|----------------------|----------|---------------------------------------------------------------------------------------------------------------------|------------------------------|----------------------------------------|
| A3118-21     | Asia   | No  | c.1367C>T                | p.Ala456Val                     | 6 (HOM, M, P)                | <i>C. elegans</i>                           | NP                                       | 6 yr          | SSNS                 | ND       | complete remission (CsA)<br>→ Relapse →<br>MMF+CsA<br>SRNS (secondary)                                              | ND                           | Weak Hypermetropia, Retinal Angiopathy |
| 2706         | ND     | No  | c.4055C>T                | p. Ala1352Val                   | 17 (HOM, ND)                 | <i>D. rerio</i>                             | 5 / 245,932 (het)                        | 33 yr         | SSNS                 | ND       | complete remission with Pred within 6 mo. Stayed in complete remission for 8 yrs. Only one reoccurrence since then. | FSGS (33 yr)                 | ND                                     |
| <b>CDK20</b> |        |     |                          |                                 |                              |                                             |                                          |               |                      |          |                                                                                                                     |                              |                                        |
| A5013-21     | Arab   | Yes | c.610T>C                 | p.Phe204Leu                     | 6 (HOM, M, P)                | <i>C. elegans</i>                           | 6 / 268,594 (het)                        | 2.5 yr        | SSNS                 | ND       | complete remission by CsA; then remission by MMF without Pred (for 1.5 yrs)                                         | MPGN (2.5 yr)                | ND                                     |
| <b>ITSN1</b> |        |     |                          |                                 |                              |                                             |                                          |               |                      |          |                                                                                                                     |                              |                                        |
| A3706-21-22  | Arab   | Yes | c.538C>T                 | p.Pro180Ser                     | 7 (HOM, M, P)                | <i>C. elegans</i>                           | NP                                       | 10 mo<br>3 mo | SRNS<br>SRNS,<br>CNS | ND<br>ND | no response to Pred/CTX/CsA                                                                                         | MCNS (10 mo)<br>ND           | ND<br>ND                               |
| A977-21      | Arab   | No  | c.905A>G<br>c.4426A>G    | p.Glu302Gly<br>p.Lys1476Glu     | 10 (het, ND)<br>36 (het, ND) | <i>C. elegans</i><br><i>C. intestinalis</i> | 3 / 246,204 (het)<br>NP                  | 3 yr          | SSNS                 | ND       | partial response to CTX (for long time)                                                                             | MCNS (3 yr)<br>& FSGS (9 yr) | ND                                     |
| A2274-21     | Europe | No  | c.2554G>A<br>c.4550A>G   | p.Asp852Asn<br>p.Lys1517Arg     | 18 (het, ND)<br>36 (het, ND) | <i>C. elegans</i><br><i>C. intestinalis</i> | 5 / 229,410 (het)<br>NP                  | ND            | SSNS                 | ND       | partial response to CsA                                                                                             | ND                           | ND                                     |
| <b>ITSN2</b> |        |     |                          |                                 |                              |                                             |                                          |               |                      |          |                                                                                                                     |                              |                                        |
| Pat 1<br>2   | Japan  | No  | c.1016C>G<br>c.3640_3641 | p.Ser339Cys<br>p.Ile1214Serfs*2 | 11 (het, M)<br>30 (het, P)   | <i>D. melanogaster</i><br>NA                | 8 / 243,070 (het)<br>5 / 241,902 (het)   | 2 yr<br>2 yr  | SDNS<br>SDNS         | ND<br>ND | complete remission by CsA<br>complete remission by CsA and MZR                                                      | MCNS<br>MCNS                 | ND<br>ND                               |
| A3384        | Arab   | Yes | c.1313A>G                | p.Glu438Gly                     | 12 (HOM, M, P)               | <i>C. elegans</i>                           | 154 / 244,990 (het)<br>3 / 244,990 (HOM) | 1.4 yr        | SSNS                 | ND       | complete remission with steroid combined with CTX then combined with CsA<br>Frequent relapse                        | MPGN                         | ND                                     |

ACE-I, ACE inhibitor; *C. elegans*; *Caenorhabditis elegans*; *C. intestinalis*, *Ciona intestinalis*; CNS, congenital nephrotic syndrome; CsA, cyclosporine A; CTX, cyclophosphamide; *D. rerio*, *Danio rerio*; *D. melanogaster*, *Drosophila melanogaster*; DMS, diffuse mesangial sclerosis; ESKD, end stage kidney disease; ExAC, Exome Aggregation Consortium; FSGS, focal segmental glomerulosclerosis; *G. gallus*, *Gallus gallus*; het, heterozygous in affected individual; HOM, homozygous in affected individual; HT, hypertension; M, heterozygous mutation identified in mother; MCNS, minimal change nephrotic syndrome; mo, months; MMF, mycophenolate mofetil; MPGN, mesangioproliferative glomerulonephritis; MZR, mizoribine; NA, not applicable; ND, no data or DNA available; NP, not present; P, heterozygous mutation identified in father; Pred, prednisolone; RTX, resiniferatoxin; SDNS, steroid-dependent nephrotic syndrome; SRNS, steroid-resistant nephrotic syndrome; SSNS, steroid-sensitive nephrotic syndrome; wks, weeks; yr, years.

<sup>a</sup>A founder mutation from India is underlined.

**Supplementary Table 2: Filtering process for variants from normal reference sequence following homozygosity mapping (HM) and whole exome sequencing (WES) in 3 families (A1358, A5013 and A3706) with NS.**

| <b>FAMILY</b>                                                                                               | <b>A1358</b>           | <b>A5013</b>           | <b>A3706</b>           |
|-------------------------------------------------------------------------------------------------------------|------------------------|------------------------|------------------------|
| <sup>a</sup> <b>INDIVIDUALS SENT FOR WES</b>                                                                | <b>A1358-21</b>        | <b>A5013-21</b>        | <b>A3706-21</b>        |
| Consanguinity                                                                                               | Yes                    | Yes                    | Yes                    |
| Number of homozygosity peaks                                                                                | <sup>b</sup> 10        | <sup>b</sup> 12        | <sup>b</sup> 17        |
| Cumulative homozygosity by descent [Mb]                                                                     | 196                    | 242                    | 106                    |
| <sup>c</sup> Hypothesis from mapping                                                                        | Hom                    | Hom                    | Hom                    |
| Total sequence reads (Million)                                                                              | 56                     | 78                     | 81                     |
| Matched Reads                                                                                               | 98.1%                  | 98.7%                  | 97.8%                  |
| Total number of variants detected                                                                           | 327,837                | 506,701                | 300,796                |
| Reject common dbSNP137; MAF>1%; variants remaining                                                          | 142,377                | 253,896                | 137,540                |
| Keep VF>=55% AND cov >=2                                                                                    | 71,383                 | 155,483                | 82,102                 |
| Keep non-synonymous and splice                                                                              | 1,299                  | 1,280                  | 1,409                  |
| Keep located in hom peaks (Located within splice site; deletioninsertion; stop gained/stop lost; Missenses) | 106                    | 71                     | 199                    |
| Remaining variants after inspection                                                                         | 8                      | 1                      | 16                     |
| <sup>d</sup> Sanger confirmation / segregation in family                                                    | <b>1</b>               | <b>1</b>               | <b>1</b>               |
| Causative gene identified                                                                                   | <b><i>TNS2</i></b>     | <b><i>CDK20</i></b>    | <b><i>ITSN1</i></b>    |
| Mutation effect on gene product                                                                             | <b>Arg292Gln (Hom)</b> | <b>Phe204Leu (Hom)</b> | <b>Pro180Ser (Hom)</b> |

<sup>a</sup> see Supplementary Table 1

<sup>b</sup> see Fig. 1

<sup>c</sup> evaluation for homozygous variants was done in regions of homozygosity by descent for affected individuals

<sup>d</sup> red numbers denote number of filtered-down variant(s) that contained the disease causing gene

cov, coverage; hom; homozygous; het, heterozygous; MAF, minor allele frequency; NA, not applicable; NS, Nephrotic Syndrome; VF, variant frequency



**Supplementary Table 3: Filtering process for variants from normal reference sequence following whole exome sequencing (WES) in the Japanese family (Pat) with NS.**

| FAMILY                              | PAT                                         |                                             |                        |                   |                        |
|-------------------------------------|---------------------------------------------|---------------------------------------------|------------------------|-------------------|------------------------|
| FAMILY MEMBERS                      | Pat1                                        | Pat2                                        | Father                 | Mother            | Unaffected sibling     |
| Total sequence reads (Million)      | 172                                         | 174                                         | 191                    | 147               | 181                    |
| Mapped reads                        | 99.5%                                       | 99.5%                                       | 99.0%                  | 99.5%             | 97.3%                  |
| Total number of variants detected   | 1,120,672                                   | 1,079,713                                   | 1,177,336              | 1,001,731         | 1,052,434              |
| Filtering for low-quality variants  | 926,235                                     | 897,251                                     | NA                     | NA                | NA                     |
| Keep non-synonymous and splice      | 10,906                                      | 11,096                                      | NA                     | NA                | NA                     |
| Keep 1000genomes MAF<0.01           | 1,176                                       | 1,217                                       | NA                     | NA                | NA                     |
| Keep Esp6500i MAF<0.01              | 1,086                                       | 1,121                                       | NA                     | NA                | NA                     |
| Genes with hom or multiple variants | 137 genes (454 variants)                    | 139 genes (429 variants)                    | NA                     | NA                | NA                     |
| Autosomal recessive segregation     | 2 genes ( <i>ITSN2</i> , <i>KIF19</i> )     |                                             |                        |                   |                        |
| Absent homozygote in HGVD           | 1 gene ( <i>ITSN2</i> )                     |                                             |                        |                   |                        |
| Causative gene identified           | <b><i>ITSN2</i></b>                         |                                             |                        |                   |                        |
| Mutations effect on gene product    | p.Ser339Cys (het)<br>p.Ile1214Serfs*2 (het) | p.Ser339Cys (het)<br>p.Ile1214Serfs*2 (het) | p.Ile1214Serfs*2 (het) | p.Ser339Cys (het) | p.Ile1214Serfs*2 (het) |

**Supplementary Table 4. Variant Frequencies (ExAC, GnomAD and in-house NPHP cohort), and *in-silico* prediction scores for all mutations identified in genes *MAGI2*, *TNS2*, *DLC1*, *CDK20*, *ITSN1* and *ITSN2* in NS families.**

| Family-Individual   | Nucleotide change      | Amino acid change           | Exon (zygosity, segregation) | ExAC Allele count (zygosity)             | GnomAD Allele count (zygosity)             | In-house control cohort (248 NPHP exomes) | Mutation Taster <sup>a</sup> | Polyphen 2 <sup>b</sup> |
|---------------------|------------------------|-----------------------------|------------------------------|------------------------------------------|--------------------------------------------|-------------------------------------------|------------------------------|-------------------------|
| <b><i>MAGI2</i></b> |                        |                             |                              |                                          |                                            |                                           |                              |                         |
| A5146-21            | c.115G>T               | p.Gly39*                    | 1 (HOM, M, P)                | NP                                       | NP                                         | NP                                        | NA                           | NA                      |
| B91 (1302/11)       | c.2238C>G              | p.Tyr746*                   | 12 (HOM, maternal isodisomy) | NP                                       | NP                                         | NP                                        | NA                           | NA                      |
| <b><i>TNS2</i></b>  |                        |                             |                              |                                          |                                            |                                           |                              |                         |
| A1358-21            | c.875G>A               | p.Arg292Gln                 | 11 (HOM, ND)                 | 1 / 94,116 (het)                         | NP                                         | NP                                        | DC                           | 0.995                   |
| A283-21             | c.1334G>A<br>c.3382A>G | p.Arg445Gln<br>p.Thr1128Ala | 17 (het, M)<br>20 (het, P)   | 25 / 121,174 (het)<br>73 / 111,610 (het) | 68 / 277,108 (het)<br>1522 / 240,618 (het) | NP<br>2 / 248 (het)                       | DC<br>Poly                   | 0.003<br>0              |
| 2605                | c.1675G>A              | p. Gly559Arg                | 17 (HOM, ND)                 | 10 / 50,270 (het)                        | 34 / 160,586 (het)                         | NP                                        | DC                           | 0.967                   |
| A3775-21            | c.2574C>G              | p.Ile858Met                 | 18 (HOM, ND)                 | 91 / 106,314 (het)                       | 186 / 232,392 (het)                        | NP                                        | Poly                         | 0.206                   |
| A1640-21            | c.1693C>T<br>c.2574C>G | p.Arg565Trp<br>p.Ile858Met  | 18 (het, P)<br>18 (het, M)   | 14 / 41,686 (het)<br>91 / 106,314 (het)  | 22 / 119,318 (het)<br>186 / 232,392 (het)  | NP<br>NP                                  | DC<br>Poly                   | 0.976<br>0.206          |
| <b><i>DLC1</i></b>  |                        |                             |                              |                                          |                                            |                                           |                              |                         |
| A548-21             | c.29G>A<br>c.128G>C    | p.Trp10*<br>p.Ser43Thr      | 2 (het, ND)<br>2 (het, ND)   | NP<br>1 / 121,402 (het)                  | NP<br>2 / 246,110 (het)                    | NP<br>NP                                  | NA<br>Poly                   | NA<br>0.202             |
| A4967-21            | c.539A>C<br>c.4073A>C  | p.Glu180Ala<br>p.Lys1358Thr | 2 (het, M)<br>15 (het, P)    | NP<br>NP                                 | NP<br>NP                                   | NP<br>NP                                  | Poly<br>DC                   | 0.024<br>0.999          |
| A3118-21            | c.1367C>T              | p.Ala456Val                 | 6 (HOM, M, P)                | NP                                       | NP                                         | NP                                        | DC                           | 0.999                   |
| 2706                | c.4055C>T              | p. Ala1352Val               | 17 (HOM, ND)                 | 2 / 120,712 (het)                        | 5 / 245,932 (het)                          | NP                                        | DC                           | 0.193                   |

| <b>CDK20</b>        |                                 |                                 |                              |                                        |                                          |          |          |                |
|---------------------|---------------------------------|---------------------------------|------------------------------|----------------------------------------|------------------------------------------|----------|----------|----------------|
| A5013<br>-21        | c.610T>C                        | p.Phe204Leu                     | 6<br>(HOM, M, P)             | NP                                     | 6 / 268,594 (het)                        | NP       | DC       | 0.991          |
| <b>ITSN1</b>        |                                 |                                 |                              |                                        |                                          |          |          |                |
| A3706<br>-21<br>-22 | c.538C>T                        | p.Pro180Ser                     | 7<br>(HOM, M, P)             | NP                                     | NP                                       | NP       | DC       | 0.968          |
| A977<br>-21         | c.905A>G<br>c.4426A>G           | p.Glu302Gly<br>p.Lys1476Glu     | 10 (het, ND)<br>36 (het, ND) | 2 / 122,860 (het)<br>NP                | 3 / 246,204 (het)<br>NP                  | NP<br>NP | DC<br>DC | 0.462<br>0.967 |
| A2274<br>-21        | c.2554G>A<br>c.4550A>G          | p.Asp852Asn<br>p.Lys1517Arg     | 18 (het, ND)<br>36 (het, ND) | 3 / 115,790 (het)<br>NP                | 5 / 229,410 (het)<br>NP                  | NP       | DC<br>DC | 0.996<br>0.980 |
| <b>ITSN2</b>        |                                 |                                 |                              |                                        |                                          |          |          |                |
| Pat<br>1<br>2       | c.1016C>G<br>c.3640_3641<br>del | p.Ser339Cys<br>p.Ile1214Serfs*2 | 11 (het, M)<br>30 (het, P)   | 8 / 120,760 (het)<br>5 / 121,366 (het) | 8 / 243,070 (het)<br>5 / 241,902 (het)   | NP<br>NP | DC<br>NA | 0.354<br>NA    |
| A3384               | c.1313A>G                       | p.Glu438Gly                     | 12<br>(HOM, M, P)            | 86 / 121284 (het)<br>2 / 121284 (HOM)  | 154 / 244,990 (het)<br>3 / 244,990 (HOM) | NP<br>NP | DC       | 0.994          |

DC, disease causing; ExAC, Exome Aggregation Consortium; GnomAD, the genome aggregation database; het, heterozygous in affected individual; HOM, homozygous in affected individual; M, heterozygous mutation identified in mother; NA, not applicable; ND, no data or DNA available; NP, not present; P, heterozygous mutation identified in father;

<sup>a</sup><http://www.mutationtaster.org/>

<sup>b</sup><http://genetics.bwh.harvard.edu/pph2/>

**Supplementary Table 5: Effect of overexpression or knockdown of novel and known NS causing gene products on small G-proteins, cell migration and animal models.**

| Proteins of interest | active RhoA     | active Rac1                    | active Cdc42                | cell migration     | Zebrafish model                                                                                                                                                       | KO Mouse Model                                                                                           |
|----------------------|-----------------|--------------------------------|-----------------------------|--------------------|-----------------------------------------------------------------------------------------------------------------------------------------------------------------------|----------------------------------------------------------------------------------------------------------|
| overexpression       | HEK293T         | HEK293T                        | HEK293T or COS7             | Human Podocytes    |                                                                                                                                                                       |                                                                                                          |
| knockdown            |                 |                                |                             | acute k.d. (siRNA) |                                                                                                                                                                       |                                                                                                          |
| MAGI2                | ↓               |                                |                             |                    |                                                                                                                                                                       |                                                                                                          |
| MAGI2                | ↓               |                                |                             | ↓                  |                                                                                                                                                                       | KO mice has NS <sup>1-3</sup>                                                                            |
| TNS2                 | ↓               | ↔                              | ↔                           | ↔                  |                                                                                                                                                                       | KO mice has NS <sup>5</sup>                                                                              |
| TNS2                 | ↓ <sup>4</sup>  | ↔                              | ↔                           | ↔                  |                                                                                                                                                                       |                                                                                                          |
| DLC1                 | ↓               | ↔                              | ↔                           |                    |                                                                                                                                                                       |                                                                                                          |
| DLC1                 | ↓ <sup>a</sup>  | ↑                              | ↓                           | ↓ <sup>6</sup>     |                                                                                                                                                                       | KO mice is E.L. <sup>7</sup>                                                                             |
| CDK20                | ↓               | ↔                              | ↑                           |                    |                                                                                                                                                                       |                                                                                                          |
| CDK20                | ↓               | ↔                              | ↓                           | ↓                  |                                                                                                                                                                       |                                                                                                          |
| ITSN1                | ↔               | ↔                              | ↓                           | ↑                  |                                                                                                                                                                       |                                                                                                          |
| ITSN1                | ↔               | ↔                              | ↓                           | ↑                  |                                                                                                                                                                       |                                                                                                          |
| ITSN2                | ↔               | ↔                              | ↓                           | ↑                  |                                                                                                                                                                       |                                                                                                          |
| ITSN2                | ↔               | ↔                              | ↓                           | ↑                  |                                                                                                                                                                       | KO mice has NS                                                                                           |
| DLC1 + TNS2          | ↔               |                                |                             |                    |                                                                                                                                                                       |                                                                                                          |
| DLC1 + CDK20         | ↔               |                                |                             |                    |                                                                                                                                                                       |                                                                                                          |
| DLC1 + MAGI2         | ↑               |                                |                             |                    |                                                                                                                                                                       |                                                                                                          |
| CDK5                 |                 |                                |                             | ↓ <sup>6</sup>     |                                                                                                                                                                       |                                                                                                          |
| CDK5                 |                 |                                |                             | ↓                  |                                                                                                                                                                       |                                                                                                          |
| CAV1                 |                 |                                |                             |                    | overexpression of cav1 in zebrafish podocytes is sufficient to induce NS which can be treated with glucocorticoids. <sup>8</sup>                                      |                                                                                                          |
| CAV1                 | ↓ <sup>10</sup> | ↔ <sup>9</sup> ↑ <sup>10</sup> | ↑ <sup>1</sup>              | ↓ <sup>10</sup>    |                                                                                                                                                                       | Cav1 <sup>-/-</sup> mice showed a significantly slower wound healing rate compared with WT <sup>10</sup> |
| ARHGDI1              |                 |                                |                             |                    |                                                                                                                                                                       |                                                                                                          |
| ARHGDI1              | ↔               | ↑ <sup>b</sup> <sup>11</sup>   | ↑ <sup>b</sup> <sup>1</sup> | ↑ <sup>1</sup>     | arhgdia-deficient zebrafish: RAC1 inhibitors were partially effective in ameliorating arhgdia-associated defects. The RhoA inhibitors showed no effect. <sup>11</sup> |                                                                                                          |
| EMP2                 |                 |                                |                             |                    |                                                                                                                                                                       |                                                                                                          |
| EMP2                 |                 | ↓                              |                             |                    |                                                                                                                                                                       |                                                                                                          |
| FAT1                 |                 |                                |                             |                    |                                                                                                                                                                       |                                                                                                          |
| FAT1                 | ↓ <sup>12</sup> |                                | ↓ <sup>12</sup>             | ↓ <sup>12</sup>    |                                                                                                                                                                       | Podocyte specific Fat1 deletion disrupts podocyte differentiation <sup>12</sup>                          |
| KANK                 |                 |                                |                             |                    |                                                                                                                                                                       |                                                                                                          |
| KANK1                | ↑ <sup>13</sup> | ↑ <sup>13</sup>                |                             |                    |                                                                                                                                                                       |                                                                                                          |
| KANK2                | ↑ <sup>13</sup> |                                |                             | ↓ <sup>13</sup>    | Knockdown of kank2 in zebrafish recapitulated a nephrotic syndrome phenotype, resulting in proteinuria and podocyte foot process effacement. <sup>13</sup>            |                                                                                                          |

a Data is based on pull-down by GST-RhoA and not G-LISA.

b Data is based on pull-down by GST-PAK1 and therefore the increase can be due to active Rac1 or Cdc42 or both.

Black = Found/Validated in FH Lab

Green = Based on Literature

Blue = Based on hypothesis

**Literature:**

- Balbas MD et al. MAGI-2 scaffold protein is critical for kidney barrier function. *Proc Natl Acad Sci USA* (2014).
- Ihara K et al. MAGI-2 is critical for the formation and maintenance of the glomerular filtration barrier in mouse kidney. *Am J Pathol* (2014).
- Lefebvre J et al. Alternatively spliced isoforms of WT1 control podocyte-specific gene expression. *Kidney Int* (2015).
- Clark K et al. Tensin 2 modulates cell contractility in 3D collagen gels through the RhoGAP DLC1. *J Cell Biochem* (2010).
- Nishino T et al. The 129 genetic background affects susceptibility to glomerulosclerosis in tensin-2 deficient mice. *Biomedical Research* (2012).
- Tripathi BK et al. CDK5 is a major regulator of the tumor suppressor DLC1. *J of Cell Biol* (2015).
- Durkin ME et al. DLC-1, a Rho GTPase-activating protein with tumor suppressor function, is essential for embryonic development. *FEBS* 2005.
- Wan X et al. Loss of Epithelial Membrane Protein 2 Aggravates Podocyte Injury via Upregulation of Caveolin-1. *JASN* (2015).
- Nethe M et al. Focal-adhesion targeting links caveolin-1 to a Rac1-degradation pathway. *J Cell Science* (2010)
- Garcia AG et al. Caveolin-1 regulates cell polarization and directional migration through Src kinase and Rho GTPases. *JCB* (2007)
- Gee YH et al. ARHGDI1 mutations cause nephrotic syndrome via defective RHO GTPase signaling. *J Clin Invest* (2013)
- Gee YH et al. FAT1 mutation cause a glomerulotubular nephropathy. *Nat Commun* (2016)
- Gee YH et al. KANK deficiency leads to podocyte dysfunction and nephrotic syndrome. *J Clin Invest* (2015)

**Supplementary Table 6. Mutations in *MAGI2*, *TNS2*, *DLC1*, *CDK20*, *ITSN1* and *ITSN2* in 17 families with NS interfere with multiple aspects of pathogenesis of NS.**

| Family-Individual   | Nucleotide change      | Amino acid change           | Exon (Zygosity, Segregation) | <u>Loss of function shown in:</u><br><br>Active RhoA/Rac1/Cdc42 | <u>Loss of function shown in:</u><br><br>Coimmunoprecipitation | <u>Loss of function shown in:</u><br><br>Cell migration | <u>Loss of function shown in:</u><br><br>Immunofluorescence (colocalization <u>or</u> filopodia induction) | KO Mouse Model                  |
|---------------------|------------------------|-----------------------------|------------------------------|-----------------------------------------------------------------|----------------------------------------------------------------|---------------------------------------------------------|------------------------------------------------------------------------------------------------------------|---------------------------------|
| <b><i>MAGI2</i></b> |                        |                             |                              |                                                                 |                                                                |                                                         |                                                                                                            |                                 |
| A5146-21            | c.115G>T               | p.Gly39*                    | 1 (HOM, M, P)                | Yes (RhoA)                                                      | Yes (abrogation of interaction with TNS2 and DLC1)             | no readout                                              | Yes (Mislocalization with $\beta$ -catenin at adherens junctions)                                          | KO Mice have NS (Published) 1-3 |
| B91 (1302/11)       | c.2238C>G              | p.Tyr746*                   | 12 (HOM, maternal isodisomy) | Yes (RhoA)                                                      | Yes (abrogation of interaction with TNS2)                      | no readout                                              | Yes (Mislocalization with $\beta$ -catenin at adherens junctions)                                          | KO Mice have NS (Published) 1-3 |
| <b><i>TNS2</i></b>  |                        |                             |                              |                                                                 |                                                                |                                                         |                                                                                                            |                                 |
| A1358-21            | c.875G>A               | p.Arg292Gln                 | 13 (HOM, ND)                 | Yes (RhoA)                                                      | No                                                             | no readout                                              | -                                                                                                          | KO Mice has NS (Published) 4    |
| A283-21             | c.1334G>A<br>c.3382A>G | p.Arg445Gln<br>p.Thr1128Ala | 17 (het, M)<br>20 (het, P)   | Yes (RhoA)<br>Yes (RhoA)                                        | No<br>No                                                       | no readout<br>no readout                                | -<br>-                                                                                                     | KO Mice has NS (Published) 4    |
| 2605                | c.1675G>A              | p. Gly559Arg                | 17 (HOM, ND)                 | Yes (RhoA)                                                      | No                                                             | no readout                                              | -                                                                                                          | KO Mice has NS (Published) 4    |
| A3775-21            | c.2574C>G              | p.Ile858Met                 | 18 (HOM, ND)                 | Yes (RhoA)                                                      | No                                                             | no readout                                              | -                                                                                                          | KO Mice has NS (Published) 4    |
| A1640-21            | c.1693C>T<br>c.2574C>G | p.Arg565Trp<br>p.Ile858Met  | 18 (het, P)<br>18 (het, M)   | Yes (RhoA)<br>Yes (RhoA)                                        | No<br>No                                                       | no readout<br>no readout                                | -<br>-                                                                                                     | KO Mice has NS (Published) 4    |
| <b><i>DLC1</i></b>  |                        |                             |                              |                                                                 |                                                                |                                                         |                                                                                                            |                                 |
| A548-21             | c.29G>A                | p.Trp10*                    | 2 (het, ND)                  | Yes (RhoA)                                                      | Yes (abrogation of interaction with CAV1)                      | Yes                                                     | -                                                                                                          | -                               |
|                     | c.128G>C               | p.Ser43Thr                  | 2 (het, ND)                  | Yes (RhoA)                                                      | No                                                             | No                                                      | -                                                                                                          | -                               |
| A4967-21            | c.539A>C<br>c.4073A>C  | p.Glu180Ala<br>p.Lys1358Thr | 2 (het, M)<br>15 (het, P)    | Yes (RhoA)<br>Yes (RhoA)                                        | No<br>Yes (abrogation of interaction with CAV1)                | No<br>Yes                                               | -<br>-                                                                                                     | -                               |

|                     |                    |                  |                   |             |    |            |                                                                                  |                                                                                            |
|---------------------|--------------------|------------------|-------------------|-------------|----|------------|----------------------------------------------------------------------------------|--------------------------------------------------------------------------------------------|
| A3118<br>-21        | c.1367C>T          | p.Ala456Val      | 6<br>(HOM, M, P)  | Yes (RhoA)  | No | Yes        | -                                                                                | -                                                                                          |
| 2706                | c.4055C>T          | p. Ala1352Val    | 17<br>(HOM, ND)   | Yes (RhoA)  | No | Yes        | -                                                                                | -                                                                                          |
| <b>CDK20</b>        |                    |                  |                   |             |    |            |                                                                                  |                                                                                            |
| A5013<br>-21        | c.610T>C           | p.Phe204Leu      | 6<br>(HOM, M, P)  | Yes (RhoA)  | No | no readout | -                                                                                | -                                                                                          |
| <b>ITSN1</b>        |                    |                  |                   |             |    |            |                                                                                  |                                                                                            |
| A3706<br>-21<br>-22 | c.538C>T           | p.Pro180Ser      | 7<br>(HOM, M, P)  | Yes (Cdc42) | -  | no readout | Yes (decreased<br>filopodia induction)                                           | KO Mice show<br>neuronal defects<br>(Published) 5                                          |
| A977<br>-21         | c.905A>G           | p.Glu302Gly      | 10 (het, ND)      | Yes (Cdc42) | -  | no readout | Yes (decreased<br>filopodia induction)<br>Yes (decreased<br>filopodia induction) | KO Mice show<br>neuronal defects<br>(Published) 5                                          |
|                     | c.4426A>G          | p.Lys1476Glu     | 36 (het, ND)      | Yes (Cdc42) | -  | no readout |                                                                                  |                                                                                            |
| A2274<br>-21        | c.2554G>A          | p.Asp852Asn      | 18 (het, ND)      | Yes (Cdc42) | -  | no readout | Yes (decreased<br>filopodia induction)<br>Yes (decreased<br>filopodia induction) | KO Mice show<br>neuronal defects<br>(Published) 5                                          |
|                     | c.4550A>G          | p.Lys1517Arg     | 36 (het, ND)      | Yes (Cdc42) | -  | no readout |                                                                                  |                                                                                            |
| <b>ITSN2</b>        |                    |                  |                   |             |    |            |                                                                                  |                                                                                            |
| Pat<br>1<br>2       | c.1016C>G          | p.Ser339Cys      | 11 (het, M)       | Yes (Cdc42) | -  | no readout | Yes (decreased<br>filopodia induction)<br>Yes (decreased<br>filopodia induction) | Itsn2 <sup>-/-</sup> mice<br>develop<br>incompletely<br>penetrant NS upon<br>LPS injection |
|                     | c.3640_3641<br>del | p.Ile1214Serfs*2 | 30 (het, P)       | Yes (Cdc42) | -  | no readout |                                                                                  |                                                                                            |
| A3384               | c.1313A>G          | p.Glu438Gly      | 12<br>(HOM, M, P) | Yes (Cdc42) | -  | no readout | Yes (decreased<br>filopodia induction)                                           | Itsn2 <sup>-/-</sup> mice<br>develop<br>incompletely<br>penetrant NS upon<br>LPS injection |

- Balbas MD *et al.* MAGI-2 scaffold protein is critical for kidney barrier function. *Proc Natl Acad Sci USA* (2014).
- Ihara K *et al.* MAGI-2 is critical for the formation and maintenance of the glomerular filtration barrier in mouse kidney. *Am J Pathol* (2014).
- Lefebvre J *et al.* Alternatively spliced isoforms of WT1 control podocyte-specific gene expression. *Kidney Int* (2015).
- Nishino T *et al.* The 129 genetic background affects susceptibility to glomerulosclerosis in tensin-2 deficient mice. *Biomedical Research* (2012).
- Yu Y *et al.* Mice deficient for the chromosome 21 ortholog Itsn1 exhibit vesicle-trafficking abnormalities. *Hum Mol Genet* (2008).

het, heterozygous in affected individual; HOM, homozygous in affected individual; M, heterozygous mutation identified in mother; NA, not applicable; ND, no data or DNA available; P, heterozygous mutation identified in father.

**Supplementary Table 7: Genes included in the targeted next generation sequencing.**

| <b>Gene</b>     | <b>Regions</b> | <b>Coverage</b> |
|-----------------|----------------|-----------------|
| <i>ITSN2</i>    | 45             | 99.50%          |
| <i>ACTN4</i>    | 25             | 100%            |
| <i>ACTR2</i>    | 12             | 99.61%          |
| <i>ACTR3</i>    | 12             | 98.62%          |
| <i>ARHGAP33</i> | 22             | 99.92%          |
| <i>ARHGDIA</i>  | 4              | 100%            |
| <i>ARHGEF1</i>  | 31             | 99.58%          |
| <i>ARHGEF12</i> | 39             | 99.70%          |
| <i>ARHGEF6</i>  | 26             | 100%            |
| <i>ARHGEF7</i>  | 31             | 99.94%          |
| <i>CDC42</i>    | 10             | 97.41%          |
| <i>FGD1</i>     | 17             | 100%            |
| <i>FGD3</i>     | 21             | 99.05%          |
| <i>ITSN1</i>    | 49             | 99.64%          |
| <i>MCF2L</i>    | 48             | 99.81%          |
| <i>MYO1E</i>    | 31             | 100%            |
| <i>PAK1</i>     | 24             | 97.30%          |
| <i>PAK2</i>     | 15             | 96.59%          |
| <i>RAC1</i>     | 9              | 100%            |
| <i>RHOA</i>     | 10             | 100%            |
| <i>WAS</i>      | 14             | 100%            |

**Supplementary Table 8: RNAi target sequences.**

| Primer                        | Target sequence                                                        |
|-------------------------------|------------------------------------------------------------------------|
| Human <i>MAGI2</i> , siRNA #7 | GAGUCUGGAUCCACUAUAA                                                    |
| Human <i>TNS2</i> , siRNA #5  | CUACACAUCUGGAGUCUAU                                                    |
| Human <i>DLC1</i> , siRNA #5  | GCCGATGTCGTAATTCCTATA                                                  |
| Mouse <i>Dlc1</i> , siRNA #1  | GGAUCAAGGUUCCAGACUA                                                    |
| Human <i>CDK20</i> , siRNA #9 | AGGCACAGGUCAAGAGCUA                                                    |
| Human <i>ITSN1</i> , siRNA #6 | GAACGAAAGAUCAUAGAAU                                                    |
| Human <i>TNS2</i> shRNA #1    | gatccGCATGACCTGACCCGCTTAAACGAATTTAAGCGGGTCAGGTCATGCTTTTTTACGCGTg       |
|                               | aattcACGCGTAAAAAAGCATGACCTGACCCGCTTAAATTCGTTTAAGCGGGTCAGGTCATGCg       |
| Human <i>DLC1</i> shRNA #2    | gatccgcacaacagaggactgccattattcgaaaataatggcagtcctctgtttgtgcTTTTTACGCGTg |
|                               | aattcACGCGTAAAAAagcacaacagaggactgccattatttcgaataatggcagtcctctgtttgtgcg |
